1 **Characterizing the Effects of Glutathione as an Immunoadjuvant in the Treatment of**  
2 **Tuberculosis**

3 **Authors**

4 Ruoqiong Cao<sup>1,2#</sup>, Garrett Teskey<sup>3#</sup>, Hicret Islamoglu<sup>4</sup>, Rachel Abraham<sup>3</sup>, Karo Gyurjian<sup>2</sup>, Li  
5 Zhong<sup>1,2</sup>, and Vishwanath Venketaraman<sup>2,3\*</sup>

6  
7 **Affiliations:**

8 <sup>1</sup> College of life Sciences, Hebei University, Baoding, Hebei 071000, China

9 <sup>2</sup> Department of Basic Medical Sciences, College of Osteopathic Medicine of the Pacific,  
10 Western University of Health Sciences, Pomona, CA 91766-1854, USA

11 <sup>3</sup> Graduate College of Biomedical Sciences, Western University of Health Sciences,  
12 Pomona, CA 91766-1854, USA

13 <sup>4</sup> Department of Biological Sciences, California State Polytechnic University, Pomona, CA  
14 91768, USA

15  
16 \*Corresponding author contact information:

17  
18 Vishwanath Venketaraman, Ph. D.  
19 Associate Professor  
20 Microbiology/Immunology  
21 Department of Basic Medical Sciences  
22 College of Osteopathic Medicine of the Pacific  
23 Western University of Health Sciences  
24 309 E Second Street  
25 Pomona, CA 91766-1854  
26 Phone: 909-706-3736  
27 Fax: 909-469-5698  
28 Email: vvenketaraman@westernu.edu

29  
30 # equal contribution

31

32

33 **Abstract**

34 *Mycobacterium tuberculosis* (*M. tb*) is the etiological agent that is responsible for causing  
35 tuberculosis (TB), which continues to affect millions of people worldwide, with an ever-  
36 increasing resistance to antibiotics. We tested the synergistic effects of N-acetyl cysteine (NAC,  
37 the precursor molecule for the synthesis of glutathione) and individual first-line antibiotics  
38 typically given for the treatment of TB such as Isoniazid (INH), Rifampicin (RIF), Ethambutol  
39 (EMB) and Pyrazinamide (PZA) to improve the ability of macrophages to control intracellular  
40 *M. tb* infection. Glutathione (GSH), a pleiotropic antioxidant molecule has been previously  
41 shown to display both antimycobacterial and immune-enhancing effects. Our results indicate that  
42 there was not only an increase in beneficial immunomodulatory effects, but a greater reduction in  
43 the intracellular viability of *M. tb* when macrophages were treated with the combination of  
44 antibiotics (INH/RIF/EMB or PZA) and NAC.

45

46

47

48

49

## 50 **Introduction**

51 *Mycobacterium tuberculosis* (*M. tb*), is the causative agent of tuberculosis (TB), and a  
52 leading cause of death worldwide [1]. According to the World Health Organization (WHO), TB  
53 is currently the ninth leading cause of mortality worldwide and the principal cause of death due  
54 to a single infectious agent [2]. The WHO reported that 10.4 million people contracted an active  
55 TB infection in 2016 alone [2]. *M. tb* infection is acquired via inhalation of respiratory droplets,  
56 leading to the seeding of the bacteria within the lungs. More specifically, once *M. tb* enters the  
57 lower respiratory tract, it is engulfed by alveolar macrophages and becomes an intracellular  
58 pathogen [3]. At this point a competent immune system will mount an attack against the bacteria,  
59 either killing it off completely, or more characteristically, sequestering the bacteria within a  
60 specialized immune structure known as a granuloma, archetypally localized within the lungs [4].  
61 This process of mycobacterial containment within a granuloma is referred to as latent TB and is  
62 observed in the majority of TB cases. A granuloma consists of a multitude of immune cells  
63 which come together to orchestrate this protective immune response, including: macrophages,  
64 epithelioid histiocytes, dendritic cells, T cells and natural killer (NK) cells, which isolate the  
65 bacteria rendering it latent [5]. The accumulation of these immune cells is mediated by various  
66 cytokines, including TNF- $\alpha$ , IL-6, IL-12, IL-2 and IFN- $\gamma$ [6].

67 However, in an immunocompromised individual *M. tb* granulomas can undergo  
68 liquefaction resulting in an active TB infection [7]. Individuals with active TB are not only  
69 contagious but are at a serious risk for developing permanent morbidity due to vast cellular  
70 damage. Therefore, the Center for Disease Control and Prevention (CDC) recommends that the  
71 preferred treatment regimen for an active TB consists of the combined administration of the  
72 antibiotics Isoniazid (INH), Rifampicin (RIF), Pyrazinamide (PZA), and Ethambutol (EMB) for

73 2 months (the intensive phase), followed by the administration of INH and RIF for 4 months (the  
74 continuation phase) [8-10]. These antibiotics are primarily used in combination to prevent the  
75 bacteria from developing resistance. In lieu of RIF, rifapentine may be used for intermittent  
76 dosing, or rifabutin as it has fewer interactions with anti-HIV medications and opioid substitution  
77 therapy [11]. However, these alternative medications are more expensive than RIF and are not  
78 universally available in all TB programs [12]. Positive prognostic indicators include patients  
79 feeling better within a few weeks of beginning treatment and will typically become non-  
80 infectious during the intensive phase [12]. The intensive phase is followed by the continuation  
81 phase of treatment which consists of four-months of treatment with INH and RIF (the two most  
82 powerful first-line antibiotics) [8-10]. A patient is declared cured upon completing this treatment  
83 and achieving two negative TB tests. However, TB treatment has been experiencing a rising risk  
84 of failure due to the development of multidrug resistant strains of *M. tb*, largely due to  
85 noncompliance and inadequate adherence to standard treatment protocols and the necessary  
86 cessation of treatment due to the detrimental side effects that can be associated with the use of  
87 the aforementioned antibiotics [13]. Side effects, particularly nausea and abdominal pain, are  
88 relatively common [14]. Additionally, urine and tears can turn orange, which is harmless but can  
89 be disconcerting if patients are not forewarned [15]. More severe side effects, such as joint pain,  
90 visual impairment, peripheral neuropathy (nerve damage) and hepatotoxicity leading to liver  
91 damage are less common but can be serious when they do occur [16]. In 2012, bedaquiline, used  
92 to treat drug resistant-TB (DR-TB), became the first new TB drug from a new class to be  
93 approved by the U.S. Food and Drug Administration (FDA) in over 40 years [17]. In 2014,  
94 bedaquiline's U.S. accelerated approval was followed by the European Medicines Agency's  
95 (EMA's) conditional approval of bedaquiline as well as another new drug, delamanid, for the

96 treatment of specific forms of DR-TB, emphasizing the urgent need to develop new treatment  
97 options for both drug sensitive and drug resistant TB [18].

98 In search of a novel therapeutic agent to augment the treatment of TB, we investigated  
99 the synergistic effects of the glutathione (GSH) precursor N-acetyl cysteine (NAC), in  
100 conjunction with the individual aforementioned first-line antibiotics in promoting macrophage-  
101 mediated killing of *M. tb*. NAC has been widely used for several years to enhance the  
102 intracellular levels of GSH [19]. GSH, a tripeptide comprised of glutamate, cysteine and glycine,  
103 functions to protect the cells and tissues from oxidative damage thereby restoring redox  
104 homeostasis within the body [20]. Further studies have demonstrated that the biological  
105 antioxidant GSH has both antimycobacterial effects and immune-modulating properties [21-23].

106 Our laboratory has previously reported that the levels of GSH were significantly  
107 decreased in the red blood cells, NK cells, macrophages and T cells derived from the peripheral  
108 blood of individuals with HIV infection [24-26]. Furthermore, we have also demonstrated that  
109 the levels of GSH were significantly compromised in brain tissue samples derived from the  
110 frontal cortex of individuals with HIV infection [21]. The decreased levels of GSH among the  
111 HIV infected individuals correlated with the diminished control of *M. tb* infection [21-23].  
112 Additional studies have shown that the levels of GSH were significantly compromised in  
113 individuals with type 2 diabetes (T2DM) due to diminished levels of enzymes involved in the  
114 GSH synthesis [27]. Findings from our clinical trials indicate that supplementation with  
115 liposomal glutathione (L-GSH) restored redox homeostasis, induced cytokine balance and  
116 improved immune responses against *M. tb* infection [23]. Additionally, NAC has also been  
117 shown to have direct mycobactericidal effects [28].

118           Therefore, we hypothesized that treatment of THP-1 cells with NAC in conjunction with  
119 any one of the first line antibiotics: INH, RIF, EMB or PZA will improve the ability of  
120 macrophages to effectively control *M. tb* infection. Our study findings indicate a greater  
121 reduction in the intracellular viability of *M. tb* when macrophages were treated with the  
122 combination of NAC and antibiotics (INH/RIF/EMB or PZA).

123

124

125

126

127

128

129

130

131

132

133

134

135

136

137

138

139

140

## 141 **Material and Methods**

### 142 **THP-1 cell culture**

143 THP-1 cells were maintained RPMI media (Sigma) containing 10% Fetal bovine serum  
144 (FBS-Sigma) and 2mM glutamine (Sigma). For the assays, cell suspension was centrifuged at  
145 2,000 rpm for 15 minutes, and the pellet was resuspended in RPMI containing 10% FBS. Cell  
146 numbers in the suspension were determined by trypan blue dye exclusion staining. THP-1 cells  
147 ( $2 \times 10^5$  cells/well) were distributed in 24-well plates (Corning), treated with PMA (Phorbol 12-  
148 myristate 13-acetate) at 10 ng/ml concentration and incubated overnight at 37°C, 5% CO<sub>2</sub> to  
149 induce the differentiation to macrophages. Following overnight incubation, media in the wells  
150 were replaced with fresh media.

151

### 152 **Preparation of bacteria for infection assays**

153 The Erdman strain of *M. tb* (was gifted by Dr. Selvakumar Subbian. Rutgers New Jersey  
154 Medical School, Biomedical and Health Sciences) was used for all our infection studies. The  
155 Erdman strain of *M. tb* (will henceforth be referred to as *M. tb*) has slightly faster doubling time  
156 and is more virulent compared to the standard laboratory strain, H37Rv [29]. *M. tb* was cultured  
157 in 7H9 media (Middlebrook) supplemented with albumin dextrose complex (ADC) at 37°C until  
158 processing. The *M. tb* was processed for infection once the static culture was at the peak  
159 logarithmic phase of growth (OD between 0.5-0.8 at A600), and subsequently washed and  
160 resuspended in sterile 1X PBS. Bacterial clumps were dispersed by vortexing five times with  
161 3mm sterile glass beads at two minutes intervals. The bacterial suspension was then filtered  
162 using a 5µm syringe filter (Millipore) to remove any remaining bacterial aggregations. The  
163 single cell suspension of processed *M. tb* was serially diluted and plated on 7H11 agar to

164 determine the bacterial numbers in the processed stock. Aliquots of processed bacterial stocks  
165 were frozen at -80°C. At the time of infection, the processed frozen stocks of *M. tb* were thawed  
166 and used for the infection. All infection studies and handling of the *M. tb* was done inside a  
167 certified biosafety level 3 facility (BSL-3).

168

### 169 **THP-1 macrophage infection and treatment**

170 Differentiated macrophages were infected with processed *M. tb* at a multiplicity of  
171 infection or MOI of 0.1:1 (bacteria to macrophage ratio). Infected macrophages were incubated  
172 for 1 hour and then successively washed 3 times with warm 1X PBS to remove the  
173 unphagocytosed bacteria. Infected macrophages were then either sham-treated or received a  
174 onetime treatment with the MIC of the respective antibiotic with or without NAC addition. NAC  
175 (10 mM) was administered at 3 equal intervals throughout the trial. The treatment concentrations  
176 administered were as follows: INH (0.125 micrograms/ml), INH (0.125 micrograms/ml) + NAC  
177 (10 mM (x3)), RIF (0.125 micrograms/ml), RIF (0.125 micrograms/ml) + NAC (10 mM (x3)),  
178 EMB (8.0 micrograms/ml), EMB (8.0 micrograms/ml) + NAC (10 mM (x3)), PZA (50  
179 micrograms/ml) and PZA (50 micrograms/ml) + NAC (10 mM (x3)). The Infected cells were  
180 maintained at 37°C, 5% CO<sub>2</sub> until they were terminated at 1 hour and 12 days post-infection to  
181 determine the intracellular survival of *M. tb*.

182

183

### 184 **Termination of macrophages and CFUs assay**

185 Termination of infected macrophages was performed by collecting and storing the cell-  
186 free supernatants and lysing THP-1 cells using 250 ul of ice cold, sterile 1X PBS. Cell lysates



187 collected from the wells were vigorously vortexed and then subjected to freeze/thaw cycles to  
188 ensure complete lysis of macrophages. The collected lysates and supernatants were then diluted  
189 in sterile 1X PBS and plated on 7H11 medium (Hi Media) enriched with ADC to evaluate *M. tb*  
190 survival inside the macrophages by counting the bacterial colonies.

191

## 192 **Quantification of GSH levels in the cellular lysates**

193 The quantity of total glutathione present was measured by the colorimetric method using  
194 an assay kit from Arbor Assay (K006-H1). The macrophages lysates were first thoroughly mixed  
195 with an equal volume of cold 5% sulfosalicylic acid (SSA), and then incubated for 10 minutes at  
196 4°C, followed by centrifugation at 14000 rpm for 10 minutes. The GSH was measured following  
197 the manufacturer's instructions. All measurements were normalized by total protein levels and  
198 the results were reported in moles of GSH per gram of protein.

199

## 200 **Cytokines measurements of culture medium**

201 The effects of *M. tb* infection, antibiotic and NAC treatments in altering the production of  
202 TNF- $\alpha$  and IL-10 was determined by quantifying the levels of these cytokines in the macrophage  
203 supernatants collected at 12 days post-infection by enzyme-linked immunosorbent assay  
204 (ELISA) using assay kits from Affymetrix as per the manufacturer's protocol..

205

## 206 **Statistical Analysis**

207 Statistical data analysis was performed using GraphPad Prism Software version 7. Levels  
208 of cytokines, GSH, MDA and CFUs were compared between untreated control, antibiotic-  
209 treatment and treatment with antibiotics in conjunction with NAC using the unpaired t-test with

210 Welch correction. Reported values are in means.  $P < 0.05$  was considered significant ( $*p < 0.05$ ,  
211  $**p < 0.005$ ).

212

213

214

215

216

217

218

219

220

221

222

223

224

225

226

227

228

229

230

231

232

233

234 **Results:**

235 **Levels of total GSH in uninfected and *M. tb*-infected THP-1 cells**

236 GSH levels were measured in the lysates of THP-1 cells using an assay kit from Arbor Assays.

237 The levels of total GSH were shown to be significantly diminished in *M. tb* infected

238 macrophages compared to the uninfected control group (Fig. 1A). These results indicate that

239 infection with Erdman strain of *M. tb* can cause a significant two-fold decrease in the

240 intracellular levels of GSH in macrophages.

241

242 **Survival of Erdman strain of *M. tb* inside untreated THP-1 macrophages**

243 There was a statistically significant increase in the intracellular survival of *M. tb* residing inside

244 the untreated macrophages between the initial (1 hour) and final time point of termination (12-

245 days post-infection) [Fig. 1B]. These results signify the ability of Erdman strain of *M. tb* to

246 successfully survive and replicate inside the THP-1 cells.

247

248 **Levels of TNF- $\alpha$  in the supernatants of uninfected and *M. tb*-infected THP-1 cells**

249 Levels of TNF- $\alpha$ , a pro-inflammatory cytokine were quantified in the supernatants collected

250 from the uninfected macrophages and *M. tb*-infected macrophages by “sandwich” ELISA. When

251 compared to the uninfected control category, there was a statistically significant six-fold increase

252 in the levels of TNF- $\alpha$  in *M. tb*-infected macrophages (Fig. 1C). Our results imply that excess

253 production of TNF- $\alpha$  by *M. tb*-infected macrophages result in GSH decrease thereby favoring the

254 intracellular survival of *M. tb*.

255

256 **Measurement of GSH, bacterial survival, TNF- $\alpha$  and IL-10 levels in *M. tb*-infected and *M.***  
257 ***tb*-infected + NAC-treated THP-1 cells**

258 Treatment of *M. tb*-infected macrophages with NAC resulted in a significant two-fold increase in  
259 the intracellular levels of GSH when compared to the *M. tb* infected sham control group (Fig.  
260 2A). NAC-treatment therefore restores the levels of GSH in *M. tb*-infected macrophages.  
261 Restoration in the levels of GSH correlated with significant reduction in the intracellular survival  
262 of *M. tb* inside the NAC-treated macrophages (Fig. 2B). GSH-replenishment in *M. tb*-infected  
263 macrophages also resulted in a significant 8-fold decrease in levels of TNF- $\alpha$  compared to the *M.*  
264 *tb*-infected control group (Fig. 2C). Importantly, NAC-treatment of *M. tb*-infected macrophages  
265 resulted in a 4-fold decrease in levels of IL-10 compared to the *M. tb*-infected sham control  
266 group (Fig. 2D). These results further confirm that by restoring redox homeostasis and cytokine  
267 balance there is improved control of intracellular *M. tb* infection.

268

269

270 **Quantification of GSH levels, *M. tb* survival, TNF- $\alpha$  and IL-10 levels in *M. tb*-infected, *M.***  
271 ***tb*-infected + INH-treated and *M. tb*-infected with INH + NAC-treated THP-1 cells**

272 INH is the first line antibiotic most commonly used for treatment of *M. tb* infection. *M. tb*-  
273 infected macrophages were treated as follows: sham-treatment, treated with INH (0.125  
274 micrograms/mL), and treated with combination of INH (0.125 micrograms/mL) +NAC (10mM),  
275 and the effects of INH and INH+NAC treatments in altering the levels of GSH and cytokines,  
276 and *M. tb* survival was determined. When compared to the infected sham control, there was a  
277 significant increase in the levels of GSH in *M. tb*-infected macrophages treated with INH and  
278 INH+ NAC (Fig. 3A). In comparison to INH alone category, treatment with INH+NAC resulted

279 in complete clearance of *M. tb* infection (Fig. 3B). Treatment with either INH or the combination  
280 of INH+ NAC resulted in almost 10,000-fold decrease in the viability of *M. tb* when compared to  
281 treatment with NAC only (Fig 2B), and roughly 15,000-fold decrease in the viability of *M. tb*  
282 compared to sham control group (Fig. 1B). These results further emphasize that reduction in *M.*  
283 *tb* burden can restore the intracellular levels of GSH. Treatment of *M. tb*-infected macrophages  
284 with INH resulted in a statistically significant decrease in the levels of TNF- $\alpha$  when compared to  
285 the infected sham control group. Treatment of *M. tb*-infected macrophages with INH + NAC also  
286 resulted in a statistically significant decrease in the levels of TNF- $\alpha$  (Fig. 3C). INH + NAC  
287 treatment resulted in further reduction in the levels of TNF- $\alpha$  in comparison to treatment with  
288 INH alone. Consistent with our findings from the TNF- $\alpha$  assay, INH treatment of *M. tb*-infected  
289 macrophages also resulted in reduction in the levels of IL-10 when compared to the infected  
290 sham controls. INH + NAC treatment caused additional decrease in the levels of IL-10 (Fig. 3D).  
291 These findings specify the effects of *M. tb* clearance in diminishing the levels of TNF- $\alpha$  and IL-  
292 10.

293

294 **Quantification of GSH levels, *M. tb* survival, TNF- $\alpha$  and IL-10 levels in *M. tb*-infected, *M.***  
295 ***tb*-infected + RIF-treated and *M. tb*-infected with RIF+ NAC-treated THP-1 cells**

296 RIF is another dominant first-line antibiotic used for the treatment of TB. GSH levels were  
297 therefore measured in the *M. tb*-infected sham control macrophages and *M. tb*-infected  
298 macrophages treated with either RIF alone (0.125 micrograms/ml) or RIF (0.125 micrograms/ml)  
299 in combination with NAC (10mM). The RIF-treatment to infected macrophages resulted in a  
300 significant increase in GSH compared to the infected sham control group. Importantly, RIF +  
301 NAC treatment resulted in further enhancement in the levels of GSH and a statistically

302 significant increase compared to both infected sham control category and also RIF unaided  
303 category (Fig. 4A).

304 The notable increase in the levels of GSH in RIF + NAC treatment group was accompanied by  
305 significant and 8-fold reduction in the intracellular viability of *M. tb* compared to treatment with  
306 RIF alone (Fig. 4B). When comparing the efficacy of INH versus RIF, there was also  
307 approximately 70 times more intracellular *M. tb* when macrophages were treated with RIF  
308 instead of INH, and 25 times more bacteria when treatment of RIF with NAC was used instead  
309 of INH with NAC (Fig. 3B). When compared to sham treatment, RIF treatment reduced bacterial  
310 burden by almost 200 times (Fig. 1B) and treatment of RIF+NAC reduced the *M. tb* counts by  
311 1,600 times. Treatment of *M. tb*-infected macrophages with combination of RIF+ NAC, also  
312 resulted in a statistically significant decrease in the levels of TNF- $\alpha$  compared to both the  
313 infected sham control and lone RIF (Fig. 4C). Treatment with RIF caused 50% reduction in the  
314 levels of TNF- $\alpha$  compared to sham-treated control (Fig. 4C). In comparison to sham-control,  
315 treatment with RIF+NAC resulted in 80-fold reduction in the levels of TNF- $\alpha$  (Fig. 4C). RIF  
316 administered alone was not able to lower the levels of TNF- $\alpha$  as much as INH by itself, but the  
317 addition of NAC to RIF, lowered the TNF- $\alpha$  levels 8 times more than that of INH and NAC  
318 treatment (Fig. 3C). RIF treatment resulted in a decrease in the levels of IL-10 compared to the  
319 sham-control group (Fig 4D). Treatment of *M. tb*-infected macrophages with combination of  
320 RIF+ NAC, resulted in a further decrease in the levels of IL-10 compared to the control and lone  
321 RIF, but neither of these decreases were statistically significant (Fig 4D). IL-10 trends were very  
322 similar when comparing RIF and INH treatments. However, INH was twice as effective in  
323 lowering the levels of IL-10 in macrophage cultures (Fig. 3D).

324

325 **Quantification of GSH levels, *M. tb* survival, TNF- $\alpha$  and IL-10 levels in *M. tb*-infected, *M.***  
326 ***tb*-infected + EMB-treated and *M. tb*-infected with EMB+ NAC-treated THP-1 cells**

327 EMB is an antibiotic that is normally given with a myriad of other first line antibiotics for TB  
328 treatment. We tested the efficacy of stand-alone EMB (8.0 micrograms/ml), as well as the  
329 efficacy of EMB (8.0 micrograms/ml) supplemented with NAC (10mM) in altering the levels of  
330 GSH and cytokines, and *M. tb* survival inside the macrophages. GSH levels were increased by 2-  
331 fold in the macrophages treated with EMB compared to the infected sham control group,  
332 although this increase was not significant. However, when macrophages were treated with  
333 EMB+NAC, there was a statistically significant 3-fold increase in the levels of GSH compared to  
334 the sham control category (Fig. 5A). Consistent with the increase in the levels of GSH, there  
335 was four-fold decrease in the intracellular survival of *M. tb* inside the EMB+NAC-treated  
336 macrophages compared to the stand-alone EMB treated macrophages (Fig. 5B). When compared  
337 to the infected sham control group, the infected macrophages treated with stand-alone EMB had  
338 significantly reduced levels of TNF- $\alpha$  (Fig. 5C). EMB+NAC treatment resulted in further  
339 decrease in the levels of TNF- $\alpha$  in comparison to sham-control and EMB-alone groups. EMB  
340 and EMB+NAC treatments resulted in more than 50% and 80% decrease respectively, in the  
341 levels of TNF- $\alpha$  in comparison to sham-control group (Fig. 5C). Although not significant, a  
342 distinct reduction in the levels of IL-10 was observed when *M. tb* infected macrophages were  
343 treated with EMB+ NAC (Fig. 5D).

344

345

346

347

348 **Quantification of GSH levels, *M. tb* survival, TNF- $\alpha$  and IL-10 levels in *M. tb*-infected, *M.*  
349 *tb*-infected + PZA-treated and *M. tb*-infected with PZA+ NAC-treated THP-1 cells**

350 PZA is an antibiotic that is normally given in combination with all four first-line antibiotics for  
351 the curative action against TB. To determine the effects of PZA and PZA+NAC in altering the  
352 intracellular survival of *M. tb* and production of GSH and cytokines, *M. tb* infected THP-1 cells  
353 were treated with stand-alone PZA (50 micrograms/ml) and the combination of PZA (50  
354 micrograms/ml) and NAC (10mM) treatment. When compared to the infected sham control  
355 group the levels of GSH in PZA-treated macrophages were significantly elevated (Fig. 6A).  
356 There was further enhancement in the levels of GSH when *M. tb* infected macrophages were  
357 treated with PZA+ NAC (Fig. 6A). When compared to stand-alone PZA, the combination  
358 treatment of PZA+NAC led to a statistically significant decrease in CFUs of *M. tb* (Fig. 6B).  
359 PZA was more effective in lowering the bacterial load than both RIF (Fig. 4B) and EMB (Fig.  
360 5B). Additionally, the treatment of PZA given in conjunction with NAC was as effective as the  
361 treatment of INH alone (Fig. 3B). TNF- $\alpha$  levels were quantified in the supernatants of *M. tb*  
362 infected macrophages in presence and absence of PZA and PZA+NAC. The combined  
363 treatment of PZA+NAC exhibited a statistically significant decrease in levels of TNF- $\alpha$   
364 compared to both the infected sham control and the stand-alone PZA categories (Fig. 6C). The  
365 levels of TNF- $\alpha$  after treatment with PZA was similar to that of EMB (Fig. 5C) and RIF (Fig.  
366 4C). In comparison to sham control group, IL-10 levels were decreased in *M. tb* infected  
367 macrophages treated with PZA and PZA+NAC (Fig. 6D). Although not statistically significant,  
368 the PZA-treated macrophages showed a marked decrease in IL-10 levels compared to the sham  
369 control group. Importantly, treatment with PZA+NAC resulted in a statistically significant



370 decrease in the levels IL-10, compared to the sham-control group (Fig. 6D). Furthermore, of all  
371 the first-line antibiotics tested, PZA treatment resulted in the lowest levels of IL-10 measured.

372

373

374

375

376

377

378

379

380

381

382

383

384

385

386

387

388

389

390

391

392

393

394 **Discussion:**

395 Immunocompromised individuals, such as HIV positive subjects, are increasingly  
396 susceptible to *M. tb* infection. Additionally, the rapid increase in the number of people living  
397 with drug resistant TB (DR-TB) and TB/HIV co-infection generates additional challenges for  
398 global targets of TB elimination. The standard six-month first-line antibiotic course of treatment  
399 consists of two phases: the intensive phase (the first two months) and the continuation phase (the  
400 last four months). However, treatment may differ for patients with extrapulmonary TB (TB  
401 outside of the lungs). During the intensive phase of standard treatment, patients take a daily  
402 combination of four medications: INH, RIF, PZA and EMB. These four drugs are referred to as  
403 first-line drugs and are off-patent and relatively inexpensive. However, the treatment of TB can  
404 become more complicated due to the development of drug-resistant and multidrug-resistant  
405 strains of *M. tb* [30]. Additionally, there are a variety of severe complications and side effects  
406 which can occur when taking these medications, especially when consuming the large dosage  
407 required to ensure proper elimination of a *M. tb* infection.

408 We previously reported that the virulent laboratory strain of *M. tb*, H37Rv is sensitive to  
409 physiological concentrations of GSH (5mM) when grown *in vitro* (43, 44). We also found that  
410 enhancing the levels of GSH in human macrophages by treatment with NAC (10 or 20 mM)  
411 resulted in inhibition in the growth of intracellular H37Rv (43-46, 49). Thus, GSH has direct  
412 antimycobacterial activity, functioning as an effector molecule in innate defense against *M. tb*  
413 infection (43-49). These results unfold a novel and potentially important innate defense  
414 mechanism adopted by human macrophages to control *M. tb* infection (43-49). We also reported  
415 that GSH in combination with cytokines such as IL-2 and IL-12 enhances the functional activity

416 of NK cells to inhibit the growth of *M. tb* inside human monocytes (47). We then demonstrated  
417 that GSH activates the functions of T lymphocytes to control *M. tb* infection inside human  
418 monocytes (48). These results indicate that GSH inhibits the growth of *M. tb* by both direct  
419 antimycobacterial effects as well as by enhancing the functions of immune cells (43-47). Finally,  
420 we demonstrated that the levels of GSH were significantly compromised in individuals with  
421 active pulmonary TB (49).

422 Therefore, we tested the synergistic effects of NAC (as a GSH precursor) and sub-  
423 optimal levels of individual first-line anti-TB drugs (INH, RIF, ETMB and PZA) in mediating  
424 control of *M. tb* infection inside THP-1 macrophages. The THP-1 cell line is an immortalized  
425 monocyte cell line, derived from the blood of a childhood case of acute monocytic leukemia [31,  
426 32]. Each antibiotic was administered only once throughout the trial at its MIC. The MIC was  
427 administered to ensure that complete bacterial clearance was not achieved by the  
428 supplementation of the antibiotics alone.

429 Our results demonstrate that macrophages treated with the combination of suboptimal  
430 levels of each of the first-line antibiotics given in conjunction with NAC resulted in a significant  
431 reduction in the intracellular survival of *M. tb*, when compared to the administration of  
432 unaccompanied suboptimal levels of antibiotics (Fig. 3B, Fig. 4B, Fig. 5B, and Fig. 6B). In fact,  
433 complete clearance was observed for the INH category after the additional supplementation of  
434 NAC was added (Fig. 3B). These novel findings illustrate the synergistic effects of NAC/GSH  
435 and antibiotics in improving macrophages ability to control intracellular *M. tb* and suggests that  
436 GSH has suitable potential as an adjunct with the aforementioned first-line antibiotics in clearing  
437 a *M. tb* infection and aiding in the cessation of drug resistant strains of *M. tb*.

438 We observed a significant decrease in the levels of intracellular GSH in *M. tb*-infected  
439 macrophages compared to uninfected macrophages (Fig 1A). These results indicate that *M. tb*  
440 infection can cause intracellular GSH depletion, which in turn can promote *M. tb* survival and  
441 replication inside the host cells (Fig 1C). Furthermore, enhancing the levels of GSH in *M. tb*-  
442 infected macrophages by treatment with NAC (Fig 2A) resulted in significant reduction in the  
443 intracellular survival of *M. tb* (Fig 2B). Treatment of *M. tb*-infected macrophages with each of  
444 the first-line antibiotics resulted in restoration in the levels of GSH and a statistically significant  
445 (except of EMB\*) increase when compared to the *M. tb*-infected sham control group (Fig. 3A,  
446 Fig. 4A, Fig. 5A, and Fig. 6A). These results indicate that use of antibiotics to limit *M. tb* burden  
447 in the macrophages enabled the host cells to restore the levels of GSH and improved their ability  
448 to combat the infection. Importantly, treatment of *M. tb*-infected macrophages with NAC in  
449 conjunction with each of the first-line antibiotics resulted in a statistically significant notable  
450 increase in the levels of GSH in all the categories (Fig. 3A, Fig. 4A, Fig. 5A, and Fig. 6A). The  
451 levels of GSH detected in macrophages treated with antibiotic in combination with NAC were  
452 consistently higher when compared sham control and macrophages treated with antibiotic alone  
453 (Fig. 3A, Fig. 4A, Fig. 5A, and Fig. 6A). Antibiotic treatment when given in conjunction with  
454 NAC resulted in decreased production of TNF- $\alpha$  and IL-10, by the macrophages. In the context  
455 of a *M. tb* infection, TNF- $\alpha$  is an inflammatory cytokine produced by macrophages and is  
456 particularly important in promoting the formation and maintenance of a granuloma, whereas IL-  
457 10 is an immunosuppressive cytokine which acts as negative regulator to the immune response  
458 associated with fighting of the infection [33-35]. TNF- $\alpha$  is a diverse cytokine, which has been  
459 shown to functionally aid in the formation and maintenance of a granuloma as well as play a  
460 critical role in host defense against *M. tb* in both acute phase and chronic phase of infection [36-

461 38]. However, at high levels, TNF- $\alpha$  is also implicated as the source of many inflammatory and  
462 autoimmune diseases and has been shown to cause severe tissue damage when overexpressed in  
463 relation to a *M. tb* infection [39, 40]. When the combination of NAC and each of the first-line  
464 antibiotics was administered, the TNF- $\alpha$  levels for each category was significantly reduced from  
465 the extremely high levels seen among the infected sham control and presented closer to that of  
466 the uninfected group (Fig. 1C, Fig. 3C, Fig. 4C, Fig. 5C, and Fig. 6C). Our results indicate that  
467 NAC-treatment can modulate the levels of TNF- $\alpha$  in a manner that it is significant enough to  
468 maintain a healthy granuloma but cannot cause cellular damage. Increased levels of the cytokine  
469 IL-10 can dampen the effector responses against a *M. tb* infection by inhibiting phagosome-  
470 lysosome fusion within macrophages [40, 41, 42]. Although not statistically significant, a notable  
471 reduction in the levels of IL-10 was observed for every antibiotic category when administered  
472 with NAC (Fig. 3D, Fig. 4D, Fig. 5D, and Fig. 6D). Additionally, when NAC was supplemented  
473 unaided, a reduction of roughly double the magnitude of IL-10 was likewise detected (Fig. 2D).  
474 This data implies that NAC supplementation supports the immune responses in favor of  
475 eliminating a *M. tb* infection by reducing the levels of IL-10, allowing macrophage phagosome  
476 maturation and thus enhanced pathogen elimination. Our findings illustrate that in addition to the  
477 direct antimycobacterial effects, GSH-enhancement improved the ability of first-line antibiotics  
478 to limit intracellular *M. tb* infection and modulated the cytokine production by macrophages.

479       When all four antibiotics were administered together at their MICs, complete  
480 mycobacterial clearance was observed with and without the addition of NAC (data not shown).  
481 A similar trend was observed as with the supplementation of individual antibiotics, where a  
482 significant increase in levels of GSH was detected from the administration of all four antibiotics  
483 without NAC and a further increase once NAC was additionally added (data not shown).

484 Likewise, a reduction in the levels of TNF- $\alpha$ , and IL-10 was observed among the administration  
485 of all four antibiotics without NAC supplementation and with statistical significance once NAC  
486 was also administered (data not shown).

487 Our findings highlight that GSH exhibits more physiological significance than just  
488 intracellular redox homeostasis, advocating that its enhancement aids in cytokine balance as well  
489 as augments the ability of first-line anti-TB drugs to clear a *M. tb* infection. Therefore, we  
490 believe that including GSH (NAC) in the antibiotic treatment of TB would not only limit cellular  
491 damage by means of redox balance, and subsequently reduce potential toxicity to the anti-TB  
492 medications but could possibly limit the required dosage necessary to cause complete bacterial  
493 clearance as well as help combat further emergences of DR-TB strains.

494

495

496

497

498

499

500

501

502

503

504

505

506

507 **Acknowledgments**

508 The authors appreciate the funding support from Western University of Health Sciences and  
509 financial support of NSFC grants (No. 81272444 and 81472744) to conduct this study. Sincere  
510 thanks to Dr. Jozef Stec, Marshall B. Ketchum University for providing first-line antibiotics for  
511 this study.

512

513

514

515

516

517

518

519

520

521

522

523

524

525

526

527

528

529

530 **References**

- 531 1. Smith I. *Mycobacterium tuberculosis* Pathogenesis and Molecular Determinants of  
532 Virulence. *Clinical Microbiology Reviews*. 2003;16(3):463-496.
- 533 2. World Health Organization (2017) Tuberculosis & Diabetes [Fact sheet]
- 534 3. Guirado E, Schlesinger LS, Kaplan G. Macrophages in Tuberculosis: Friend or Foe.  
535 *Seminars in immunopathology*. 2013;35(5):563-583.
- 536 4. Volkman HE, Clay H, Beery D, Chang JC, Sherman DR, Ramakrishnan L. Tuberculous  
537 granuloma formation is enhanced by a mycobacterium virulence determinant. *PLoS Biol*.  
538 2004 Nov;2(11): e367.
- 539 5. Guirado E, Mbawuike U, Keiser TL, Arcos J, Azad AK, Wang SH, Schlesinger LS:  
540 Characterization of host and microbial determinants in individuals with latent  
541 tuberculosis infection using a human granuloma model. *mBio* 2015, 6(1): e02537-02514.
- 542 6. Domingo-Gonzalez R, Prince O, Cooper A, Khader SA. Cytokines and Chemokines in  
543 *Mycobacterium tuberculosis* Infection. *Microbiol Spectr*. 2016 Oct;4(5).
- 544 7. Ehlers S, Schaible UE. The Granuloma in Tuberculosis: Dynamics of a Host–Pathogen  
545 Collusion. *Frontiers in Immunology*. 2012;3:411.
- 546 8. Dorman SE, Chaisson RE: From magic bullets back to the magic mountain: the rise of  
547 extensively drug-resistant tuberculosis. *Nature medicine* 2007, 13(3):295-298.
- 548 9. Ormerod LP: Multidrug-resistant tuberculosis (MDR-TB): epidemiology, prevention and  
549 treatment. *British Medical Bulletin* 2005, 73-74(1):17-24.
- 550 10. Udwadia ZF. MDR, XDR, TDR tuberculosis: ominous progression. *Thorax*. 2012 Apr;  
551 67(4):286-8.



- 552 11. Horne DJ, Spitters C, Narita M. Experience with Rifabutin Replacing Rifampin in the  
553 Treatment of Tuberculosis. *The International Journal of Tuberculosis and Lung Disease*.  
554 2011;15(11):1485-i.
- 555 12. Leibert E, Rom WN. New drugs and regimens for treatment of TB. *Expert review of anti-*  
556 *infective therapy*. 2010;8(7):801-813.
- 557 13. Sheno S, Heysell S, Moll A, Friedland G. Multidrug-resistant and extensively drug-  
558 resistant tuberculosis: consequences for the global HIV community. *Current opinion in*  
559 *infectious diseases*. 2009;22(1):11-17.
- 560 14. Arbex MA, Varella Mde C, Siqueira HR, Mello FA. Antituberculosis drugs: drug  
561 interactions, adverse effects, and use in special situations. Part 1: first-line  
562 drugs. *J Bras Pneumol*. 2010 Sep-Oct;36(5):626-40. Review.
- 563 15. Thwaites G, Auckland C, Barlow G, Cunningham R, Davies G, Edgeworth J, Greig J,  
564 Hopkins S, Jeyaratnam D, Jenkins N et al: Adjunctive rifampicin to reduce early  
565 mortality from *Staphylococcus aureus* bacteraemia (ARREST): study protocol for a  
566 randomised controlled trial. *Trials* 2012, 13(1):241.
- 567 16. Ramappa V, Aithal GP. Hepatotoxicity Related to Anti-tuberculosis Drugs: Mechanisms  
568 and Management. *Journal of Clinical and Experimental Hepatology*. 2013;3(1):37-49.
- 569 17. FDA News Release; United States Food and Drug Administration: Silver Spring, MD,  
570 dec 31,2012.
- 571 18. Brigden G, Hewison C, Varaine F. New developments in the treatment of drug-resistant  
572 tuberculosis: clinical utility of bedaquiline and delamanid. *Infection and Drug Resistance*.  
573 2015;8:367-378.

- 574 19. Bavarsad Shahripour R, Harrigan MR, Alexandrov AV. *N*-acetylcysteine (NAC) in  
575 neurological disorders: mechanisms of action and therapeutic opportunities. *Brain and*  
576 *Behavior*. 2014;4(2):108-122.
- 577 20. Forman HJ, Zhang H, Rinna A. Glutathione: Overview of its protective roles,  
578 measurement, and biosynthesis. *Molecular aspects of medicine*. 2009;30(1-2):1-12.
- 579 21. Saing T, Lagman M, Castrillon J, Gutierrez E, Guilford FT, Venketaraman V.  
580 Analysis of glutathione levels in the brain tissue samples from HIV-1-positive  
581 individuals and subject with Alzheimer's disease and its implication in the  
582 pathophysiology of the disease process. *BBA Clin*. 2016 May 29;6:38-44.
- 583 22. Allen M, Bailey C, Cahatol I, Dodge L, Yim J, Kassissa C, Luong J, Kasko S,  
584 Pandya S, Venketaraman V. Mechanisms of Control of Mycobacterium tuberculosis by  
585 NK Cells: Role of Glutathione. *Front Immunol*. 2015 Oct 5;6:508.
- 586 23. Ly J, Lagman M, Saing T, Singh MK, Tudela EV, Morris D, Anderson J, Daliva J,  
587 Ochoa C, Patel N, Pearce D, Venketaraman V. Liposomal Glutathione Supplementation  
588 Restores TH1 Cytokine Response to Mycobacterium tuberculosis Infection in HIV-  
589 Infected Individuals. *J Interferon Cytokine Res*. 2015 Nov;35(11):875-87.
- 590 24. Morris D, Ly J, Chi PT, Daliva J, Nguyen T, Soofer C, Chen YC, Lagman M,  
591 Venketaraman V. Glutathione synthesis is compromised in erythrocytes from  
592 individuals with HIV. *Front Pharmacol*. 2014 Apr 11;5:73.
- 593 25. Morris D, Nguyen T, Kim J, Kassissa C, Khurasany M, Luong J, Kasko S, Pandya  
594 S, Chu M, Chi PT, Ly J, Lagman M, Venketaraman V. An elucidation of neutrophil  
595 functions against Mycobacterium tuberculosis infection. *Clin Dev Immunol*.  
596 2013;2013:959650.

- 597 26. Morris D, Gonzalez B, Khurasany M, Kassissa C, Luong J, Kasko S, Pandya S, Chu  
598 M, Chi PT, Bui S, Guerra C, Chan J, Venketaraman V. Characterization of dendritic  
599 cell and regulatory T cell functions against *Mycobacterium tuberculosis*  
600 infection. *Biomed Res Int.* 2013;2013:402827.
- 601 27. Lagman M, Ly J, Saing T, Kaur Singh M, Vera Tudela E, Morris D, Chi PT, Ochoa C,  
602 Sathananthan A, Venketaraman V: Investigating the causes for decreased levels of  
603 glutathione in individuals with type II diabetes. *PloS one* 2015, 10(3):e0118436.
- 604 28. Amaral EP, Conceicao EL, Costa DL, Rocha MS, Marinho JM, Cordeiro-Santos M,  
605 D'Imperio-Lima MR, Barbosa T, Sher A, Andrade BB: N-acetyl-cysteine exhibits potent  
606 anti-mycobacterial activity in addition to its known anti-oxidative functions. *BMC*  
607 *microbiology* 2016, 16(1):251.
- 608 29. Daoud AK, Tayyar MA, Fouda IM, Harfeil NA. Effects of diabetes mellitus vs. in  
609 vitro hyperglycemia on select immune cell functions. *J Immunotoxicol.* 2009  
610 Mar;6(1):36-41.
- 611 30. Palomino JC, Martin A. Drug Resistance Mechanisms in *Mycobacterium tuberculosis*.  
612 *Antibiotics.* 2014;3(3):317-340.
- 613 31. Bosshart H, Heinzelmann M. THP-1 cells as a model for human monocytes. *Annals of*  
614 *Translational Medicine.* 2016;4(21):438.
- 615 32. Tsuchiya S, Yamabe M, Yamaguchi Y, et al. Establishment and characterization of a  
616 human acute monocytic leukemia cell line (THP-1). *Int J Cancer* 1980;26:171-6. 10.
- 617 33. Shrivastava P, Bagchi T. IL-10 modulates in vitro multinucleate giant cell  
618 formation in human tuberculosis. *PLoS One.* 2013 Oct 17;8(10):e77680.

- 619 34. Tanaka T, Narazaki M, Kishimoto T. IL-6 in Inflammation, Immunity, and Disease. *Cold*  
620 *Spring Harbor Perspectives in Biology*. 2014;6(10):a016295.  
621 doi:10.1101/cshperspect.a016295.
- 622 35. Mootoo A, Stylianou E, Arias MA, Reljic R. TNF-alpha in tuberculosis: a  
623 cytokine with a split personality. *Inflamm Allergy Drug Targets*. 2009  
624 Mar;8(1):53-62.
- 625 36. Chan J, Flynn J. The immunological aspects of latency in tuberculosis. *Clin*  
626 *Immunol*. 2004 Jan;110(1):2-12. Review.
- 627 37. Dorhoi A, Kaufmann SH. Tumor necrosis factor alpha in mycobacterial infection.  
628 *Semin Immunol*. 2014 Jun;26(3):203-9. doi: 10.1016/j.smim.2014.04.003. Epub 2014  
629 May 10. Review.
- 630 38. Flynn JL, Chan J. What's good for the host is good for the bug. *Trends*  
631 *Microbiol*. 2005 Mar;13(3):98-102. Review.
- 632 39. Dreher D, Nicod LP (2002) Dendritic cells in the mycobacterial granuloma are involved  
633 in acquired immunity. *Am J Respir Crit Care Med* 165: 1577–1578.
- 634 40. Esposito E, Cuzzocrea S. TNF-alpha as a therapeutic target in inflammatory  
635 diseases, ischemia-reperfusion injury and trauma. *Curr Med Chem*.  
636 2009;16(24):3152-67.
- 637 41. Wolff SP, Dean RT: Glucose autoxidation and protein modification. The potential role of  
638 'autoxidative glycosylation' in diabetes. *The Biochemical journal* 1987, 245(1):243-250.
- 639 42. O'Leary S, O'Sullivan MP, Keane J. IL-10 blocks phagosome maturation in  
640 mycobacterium tuberculosis-infected human macrophages. *Am J Respir Cell Mol Biol*.  
641 2011 Jul;45(1):172-80.

- 642 43. Venketaraman V, Dayaram YK, Talaue MT, Connell ND. 2005. Glutathione and  
643 nitrosoglutathione in macrophage defense against *Mycobacterium tuberculosis*. *Infect*  
644 *Immun.* 73(3):1886-9.
- 645 44. Dayaram, Y. K., Talaue, M. T., Connell, N. D., and Venketaraman, V. 2006.  
646 Characterization of a glutathione metabolic mutant of *Mycobacterium tuberculosis* and its  
647 resistance to glutathione and nitrosoglutathione. *J Bacteriology.* 188 (4):1364-72.
- 648 45. Morris D, Guerra C, Khurasany M, Guilford F, Saviola B, Huang Y and  
649 Venketaraman V. 2013. Glutathione supplementation improves macrophage functions in  
650 HIV. *Journal of Interferon and cytokine research.* 33 (5): 270-9.
- 651 46. Morris D, Guerra C, Donohue C, Oh H, Khurasany M, Venketaraman V. 2012.  
652 Unveiling the mechanisms for decreased glutathione in individuals with HIV infection.  
653 *Clin Dev Immunol.* 2012:734125.
- 654 47. Guerra C, Johal K, Morris D, Moreno S, Alvarado O, Gray D, Tanzil M, Pearce D,  
655 Venketaraman V. 2012. Control of *Mycobacterium tuberculosis* growth by activated  
656 natural killer cells. *Clin Exp Immunol.* 168(1):142-52.
- 657 48. Guerra G, Morris D, Gray D, Tanzil M, Sipin A, Kung S, Guilford F, Khasawneh F  
658 and Venketaraman V. 2011. Adaptive immune responses against *Mycobacterium*  
659 *tuberculosis* infection in healthy and HIV infected individuals. *PLoS One.* 2011. 6(12):  
660 e28378.
- 661 49. Venketaraman, V; Millman, AC; Salman, M; Swaminathan, S; Goetz, M; Lardizabal,  
662 A; Hom, D; and Connell, N. D. 2008. Glutathione levels and immune responses in  
663 *tuberculosis* patients. *Microbial pathogenesis.* 44: 255-261.
- 664

665

666 **Author Contribution statement:**

667

668 Ruoqiong Cao – Maintained and Processed macrophages and mycobacteria for experiments,

669 Performed infection studies, Performed ELISA assays, Performed microscopy work.

670

671 Garrett Teskey – Wrote the abstract, methods, and discussion sections, Maintained and

672 Processed macrophages and mycobacteria for experiments, Performed infection studies,

673 Performed ELISA assays, Performed microscopy work.

674

675 Hicret Islamoglu - Maintained and Processed macrophages and mycobacteria for experiments,

676 Performed infection studies, Performed ELISA assays, Performed microscopy work, contributed

677 to writing the results section.

678

679 Rachel Abraham - Performed microscopy work, Wrote the results section.

680

681 Karo Gyurjian - Contributed to writing the abstract and introduction sections, Made media for

682 bacterial quantification.

683

684 Li Zhong - Provided funding.

685

686 Vishwanath Venketaraman - Conceived the studies, Prepared figures, interpreted data, provided

687 funding and prepared the manuscript.

688

689 **Additional information:**

690 The authors declare that there are **NO** competing interests for this publication.

691

692

693

694

695

696

697

698

699

700

701

702

703

704

705

706

707

708

709

710

711

## 712 **Figures and Legends**

### 713 **Fig. 1A: Levels of total GSH in uninfected and *M. tb*-infected THP-1 cells.**

714 GSH assay was performed by colorimetric method using an assay kit from Arbor Assays.  
715 Corrections were made to total protein measured by BCA Protein Assay Kit from Thermo  
716 Scientific. GSH and total protein levels were measured from the cellular lysates. There was a  
717 notable decrease in the levels of GSH when THP-1 cells were infected with the Erdman strain of  
718 *M. tb*. Data represent means  $\pm$ SE from 6 trials. \*\*\* $p < 0.0005$  when comparing infected cells  
719 with uninfected.

720

### 721 **Fig. 1B: Survival of Erdman strain of *M. tb* inside untreated THP-1 macrophages.**

722 THP-1 cells were cultured in RPMI containing 10% FBS, and allowed to differentiate into  
723 macrophages by the addition of PMA at a concentration of 10 ng/ml. There was a significant  
724 increase in bacterial numbers when THP-1 cells were infected with *M. tb*. Data represent means  
725  $\pm$ SE from 6 trials. \*\*\* $p < 0.0005$  when comparing 1 hour with 12-day time point of termination.

726

### 727 **Fig. 1C: Levels of TNF- $\alpha$ in the supernatants of uninfected and *M. tb*-infected THP-1 cells.**

728 Assay of TNF- $\alpha$  was performed using an ELISA Ready-Set-Go kit from eBioscience. There was  
729 a significant increase in the levels of TNF- $\alpha$  when macrophages were infected with *M. tb*. Data  
730 represent means  $\pm$ SE from 6 trials. \* $p < 0.05$  when comparing infected samples to uninfected  
731 controls.

732

733



734

735 **Fig. 2A: Levels of total GSH in *M. tb*-infected and *M. tb*-infected + NAC-treated THP-1**  
736 **cells.**

737 GSH assay was performed by colorimetric assay using an assay kit from Arbor Assays.  
738 Corrections were made to total protein measured by BCA Protein Assay Kit from Thermo  
739 Scientific. GSH and total protein levels were measured from cellular lysates. There was a  
740 significant increase in the levels of GSH when *M. tb*-infected samples were treated with NAC.  
741 Data represent means  $\pm$ SE from 6 trials. \* $p < 0.05$  when comparing *M. tb*-infected samples treated  
742 with NAC to infected sham controls.

743

744 **Fig. 2B: Survival of Erdman strain of *M. tb* inside untreated and NAC-treated THP-1**  
745 **macrophages.**

746 THP-1 cells were cultured in a medium of RPMI and 10% FBS, and allowed to differentiate into  
747 macrophages by addition of PMA at a concentration of 10 ng/ml. There was a significant  
748 decrease in bacterial numbers when *M. tb*-infected macrophages were treated with NAC. Data  
749 represent means  $\pm$ SE from 6 trials. \* $p < 0.05$  when comparing *M. tb*-infected macrophages treated  
750 with NAC to infected sham controls.

751

752 **Fig. 2C: Assay of TNF- $\alpha$  in the supernatants from *M. tb*-infected and *M. tb*-infected + NAC-**  
753 **treated THP-1 cells.**

754 Assay of TNF- $\alpha$  was performed using an ELISA Ready-Set-Go kit from eBioscience. There was  
755 a significant decrease in the levels of TNF-a when macrophages were infected with *M. tb* and

756 treated with NAC. Data represent means  $\pm$ SE from 6 trials. \* $p < 0.05$  when comparing *M. tb*-  
757 infected macrophages treated with NAC to infected sham controls.

758

759 **Fig. 2D: Assay of IL-10 in the supernatants from *M. tb*-infected and *M. tb*-infected + NAC-**  
760 **treated THP-1 cells.**

761 IL-10 was measured using an ELISA Ready-Set-Go kit from eBioscience. Although there was a  
762 decrease in the levels of IL-10 when *M. tb*-infected macrophages were treated with NAC, this  
763 difference was not found to be statistically significant. Data represent means  $\pm$ SE from 6 trials.

764

765 **Fig. 3A: Levels of total GSH in *M. tb*-infected, *M. tb*-infected + INH-treated and *M. tb*-**  
766 **infected + INH + NAC-treated THP-1 cells.**

767 GSH assay was performed using a colorimetric assay kit from Arbor Assays. There was a  
768 significant increase in the levels of GSH when *M. tb*-infected macrophages were treated with  
769 INH and INH+NAC. Data represent means  $\pm$ SE from 6 trials. \*\* $p < 0.005$  when comparing  
770 infected samples treated with INH to infected sham controls. # $p < 0.05$  when comparing infected  
771 samples treated with INH+NAC to infected sham controls.

772

773 **Fig. 3B: Survival of Erdman strain of *M. tb* inside INH and INH + NAC-treated THP-1**  
774 **macrophages.**

775 THP-1 cells were cultured in a medium of RPMI and 10% FBS and allowed to differentiate into  
776 macrophages by addition of PMA at a concentration of 10 ng/ml. INH+NAC treatment resulted  
777 in clearance of *M. tb* infection compared to treatment with INH only. Data represent means  $\pm$ SE  
778 from 6 trials.

779

780

781 **Fig. 3C: Assay of TNF- $\alpha$  in the supernatants from INH and INH + NAC-treated THP-1**  
782 **cells.**

783 Assay of TNF- $\alpha$  was performed using an ELISA Ready-Set-Go kit from eBioscience. There was  
784 a significant decrease in the levels of TNF- $\alpha$  when samples were infected with *M. tb* and treated  
785 with either INH or INH+NAC. Data represent means  $\pm$ SE from 6 trials. \* $p < 0.05$  when  
786 comparing *M. tb*-infected macrophages treated with INH to infected sham controls. # $p < 0.05$   
787 when comparing *M. tb*-infected macrophages treated with INH+NAC to infected sham controls.

788

789 **Fig. 3D: Assay of IL-10 in the supernatants from INH and INH + NAC-treated THP-1 cells.**

790 IL-10 levels were measured using an ELISA Ready-Set-Go kit from eBioscience. Although there  
791 was a decrease in the levels of IL-10 when samples were infected with *M. tb* and treated with  
792 INH or INH+NAC, this difference was not found to be statistically significant. Data represent  
793 means  $\pm$ SE from 6 trials.

794

795 **Fig. 4A: Levels of total GSH in *M. tb*-infected, *M. tb*-infected + RIF-treated and *M. tb*-**  
796 **infected + RIF + NAC-treated THP-1 cells.**

797 GSH assay was performed using a colorimetric assay kit from Arbor Assays. There was a  
798 significant increase in the levels of GSH when *M. tb*-infected macrophages were treated with  
799 RIF and RIF+NAC. Data represent means  $\pm$ SE from 6 trials. \*\*\* $p < 0.0005$  when comparing  
800 infected macrophages treated with RIF to infected sham controls. # $p < 0.05$  when comparing

801 infected macrophages treated with RIF+NAC to RIF only. \* $p < 0.05$  when comparing infected  
802 macrophages treated with RIF+NAC to infected sham controls.

803

804 **Fig. 4B: Survival of Erdman strain of *M. tb* inside RIF and RIF + NAC-treated THP-1**  
805 **macrophages.**

806 THP-1 cells were cultured in a medium of RPMI and 10% FBS, and allowed to differentiate into  
807 macrophages by addition of PMA at a concentration of 10 ng/ml. There was a significant  
808 reduction in the bacterial numbers when THP-1 cells were treated with RIF+NAC compared to  
809 RIF only. Data represent means  $\pm$ SE from 6 trials. \* $p < 0.05$  when comparing infected samples  
810 treated with RIF+NAC to RIF only treatment.

811

812 **Fig. 4C: Assay of TNF- $\alpha$  in the supernatants from RIF and RIF + NAC-treated THP-1**  
813 **cells.**

814 Assay of TNF- $\alpha$  was performed using an ELISA Ready-Set-Go kit from eBioscience. There was  
815 a significant decrease in levels of TNF- $\alpha$  when macrophages were infected with *M. tb* and treated  
816 with RIF or RIF+NAC. Data represent means  $\pm$ SE from 6 trials. \* $p < 0.05$  when comparing  
817 infected macrophages treated with RIF or RIF+NAC to infected controls. # $p < 0.05$  when  
818 comparing infected macrophages treated with RIF+NAC to treatment with RIF only.

819

820 **Fig. 4D: Assay of IL-10 in the supernatants from RIF and RIF + NAC-treated THP-1 cells.**

821 IL-10 was measured using an ELISA Ready-Set-Go kit from eBioscience. Although there was a  
822 decrease in levels of IL-10 when macrophages were infected with *M. tb* and treated with RIF or

823 RIF+NAC, this difference was not found to be statistically significant. Data represent means  $\pm$ SE  
824 from 6 trials.

825

826

827

828 **Fig. 5A: Levels of total GSH in *M. tb*-infected, *M. tb*-infected + EMB-treated and *M. tb*-**  
829 **infected + EMB + NAC-treated THP-1 cells.**

830 GSH assay was performed using a colorimetric assay kit from Arbor Assays. There was a  
831 significant increase in the levels of GSH when infected macrophages were treated with  
832 EMB+NAC. Data represent means  $\pm$ SE from 6 trials. <sup>#</sup>p<0.05 when comparing infected samples  
833 treated with EMB+NAC to infected controls.

834

835 **Fig. 5B: Survival of Erdman strain of *M. tb* inside EMB and EMB + NAC-treated THP-1**  
836 **macrophages.**

837 THP-1 cells were cultured in a medium of RPMI and 10% FBS, and allowed to differentiate into  
838 macrophages by addition of PMA at a concentration of 10 ng/ml. There was a significant  
839 reduction in the bacterial numbers when THP-1 cells were treated with EMB+NAC compared to  
840 EMB only. Data represent means  $\pm$ SE from 6 trials. \*\*\*p<0.0005 when comparing infected  
841 macrophages treated with EMB+NAC to EMB lone treatment.

842

843 **Fig. 5C: Assay of TNF- $\alpha$  in the supernatants from EMB and EMB + NAC-treated THP-1**  
844 **cells.**

845 Assay of TNF- $\alpha$  was performed using an ELISA Ready-Set-Go kit from eBioscience. There was  
846 a significant decrease in the levels of TNF- $\alpha$  when samples were infected with *M. tb* and treated  
847 with EMB or EMB+NAC. Data represent means  $\pm$ SE from 6 trials. \* $p$ <0.05 when comparing  
848 infected macrophages treated with EMB to infected sham controls. # $p$ <0.05 when comparing  
849 infected macrophages treated with EMB+NAC to treatment of infected sham controls.

850

851 **Fig. 5D: Assay of IL-10 in the supernatants from EMB and EMB + NAC-treated THP-1**  
852 **cells.**

853 IL-10 levels were measured using an ELISA Ready-Set-Go kit from eBioscience. Although there  
854 was a decrease in levels of IL-10 when macrophages were infected with *M. tb* and treated with  
855 EMB+NAC, and a slight increase when samples were treated with EMB, these differences were  
856 not found to be statistically significant. Data represent means  $\pm$ SE from 6 trials.

857

858 **Fig. 6A: Levels of total GSH in *M. tb*-infected, *M. tb*-infected + PZA-treated and *M. tb*-**  
859 **infected + PZA + NAC-treated THP-1 cells.**

860 GSH assay was performed using a colorimetric assay kit from Arbor Assays. There was a  
861 significant increase in levels of GSH when infected macrophages were treated with PZA+NAC  
862 and PZA only. Data represent means  $\pm$ SE from 6 trials. # $p$ <0.05 when comparing infected  
863 macrophages treated with PZA+NAC to infected sham controls. \*\*\* $p$ <0.0005 when comparing  
864 infected macrophages treated with PZA to infected sham controls.

865

866 **Fig. 6B: Survival of Erdman strain of *M. tb* inside PZA and PZA + NAC-treated THP-1**  
867 **macrophages.**

868 THP-1 cells were cultured in a medium of RPMI and 10% FBS, and allowed to differentiate into  
869 macrophages by addition of PMA at a concentration of 10 ng/ml. There was a significant  
870 reduction of bacterial numbers when THP-1 cells were treated with PZA+NAC compared to  
871 PZA only. Data represent means  $\pm$ SE from 6 trials. \*\* $p < 0.005$  when comparing infected  
872 macrophages treated with PZA+NAC to PZA only treatment.

873

874

875

876 **Fig. 6C: Assay of TNF- $\alpha$  in the supernatants from PZA and PZA + NAC-treated THP-1**  
877 **cells.**

878 Assay of TNF- $\alpha$  was performed using an ELISA Ready-Set-Go kit from eBioscience. There was  
879 a significant decrease in the levels of TNF- $\alpha$  when macrophages were infected with *M. tb* and  
880 treated with PZA+NAC. Data represent means  $\pm$ SE from 6 trials. \* $p < 0.05$  when comparing  
881 infected macrophages treated with PZA+NAC to infected sham controls. # $p < 0.05$  when  
882 comparing infected macrophages treated with PZA+NAC to treatment with PZA only.

883

884 **Fig. 6D: Assay of IL-10 in the supernatants from PZA and PZA + NAC-treated THP-1**  
885 **cells.**

886 IL-10 assay was performed using an ELISA Ready-Set-Go kit from eBioscience. There was a  
887 significant decrease in the levels of IL-10 when macrophages were infected with *M. tb* and  
888 treated with PZA+NAC, and a slight decrease when samples were treated with PZA (not  
889 significant). Data represent means  $\pm$ SE from 6 trials. \* $p < 0.05$  when comparing infected  
890 macrophages treated with PZA+NAC to infected sham control.

891

892

893

894

895

896

897

898

899

900

901 **FIGURES**

902



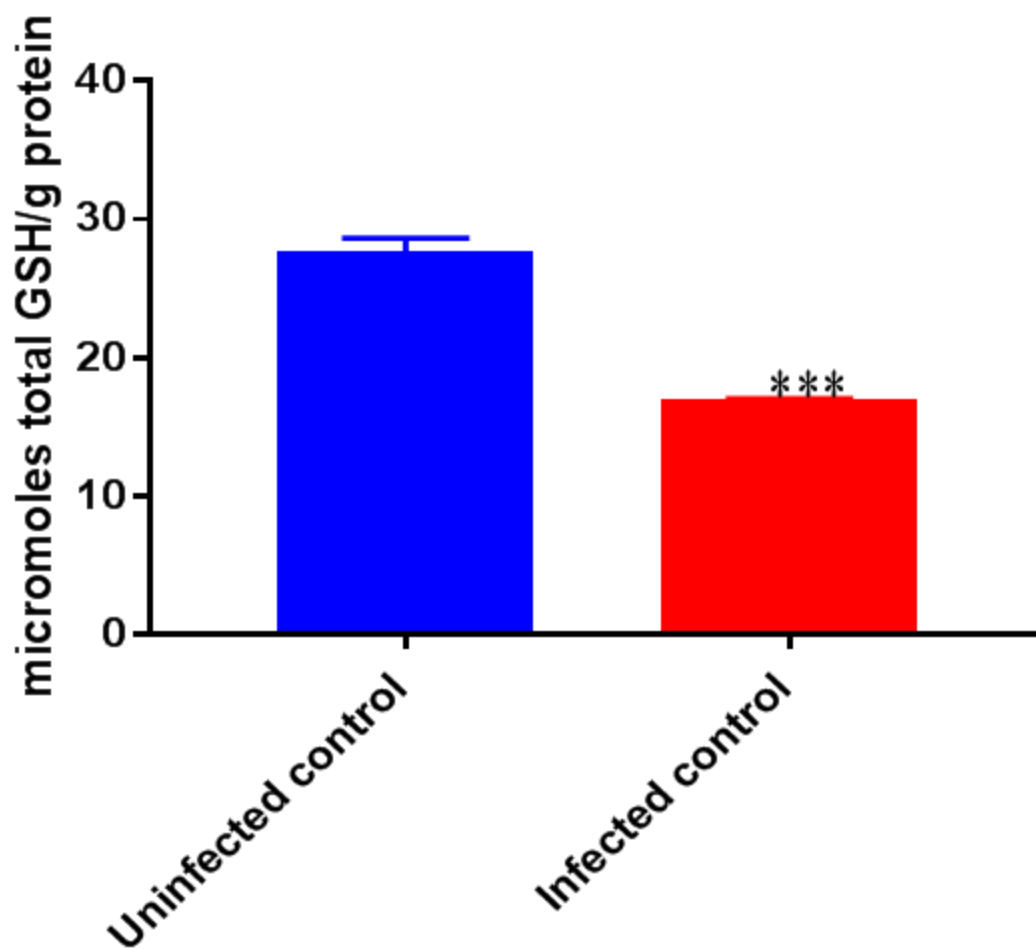

903

904 Fig. 1A: Levels of total GSH in uninfected and *M. tb*-infected THP-1 cells.

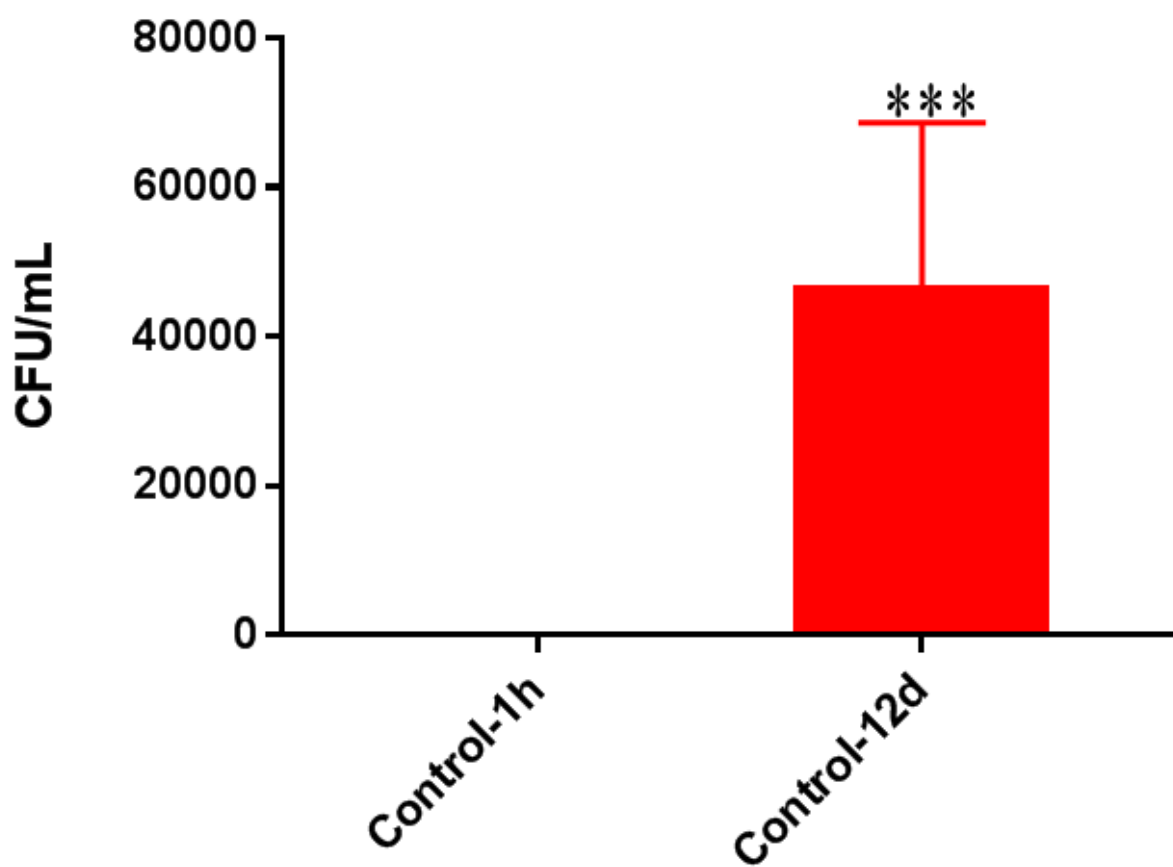

905

906 **Fig. 1B: Survival of Erdman strain of *M. tb* inside untreated THP-1 macrophages.**

907

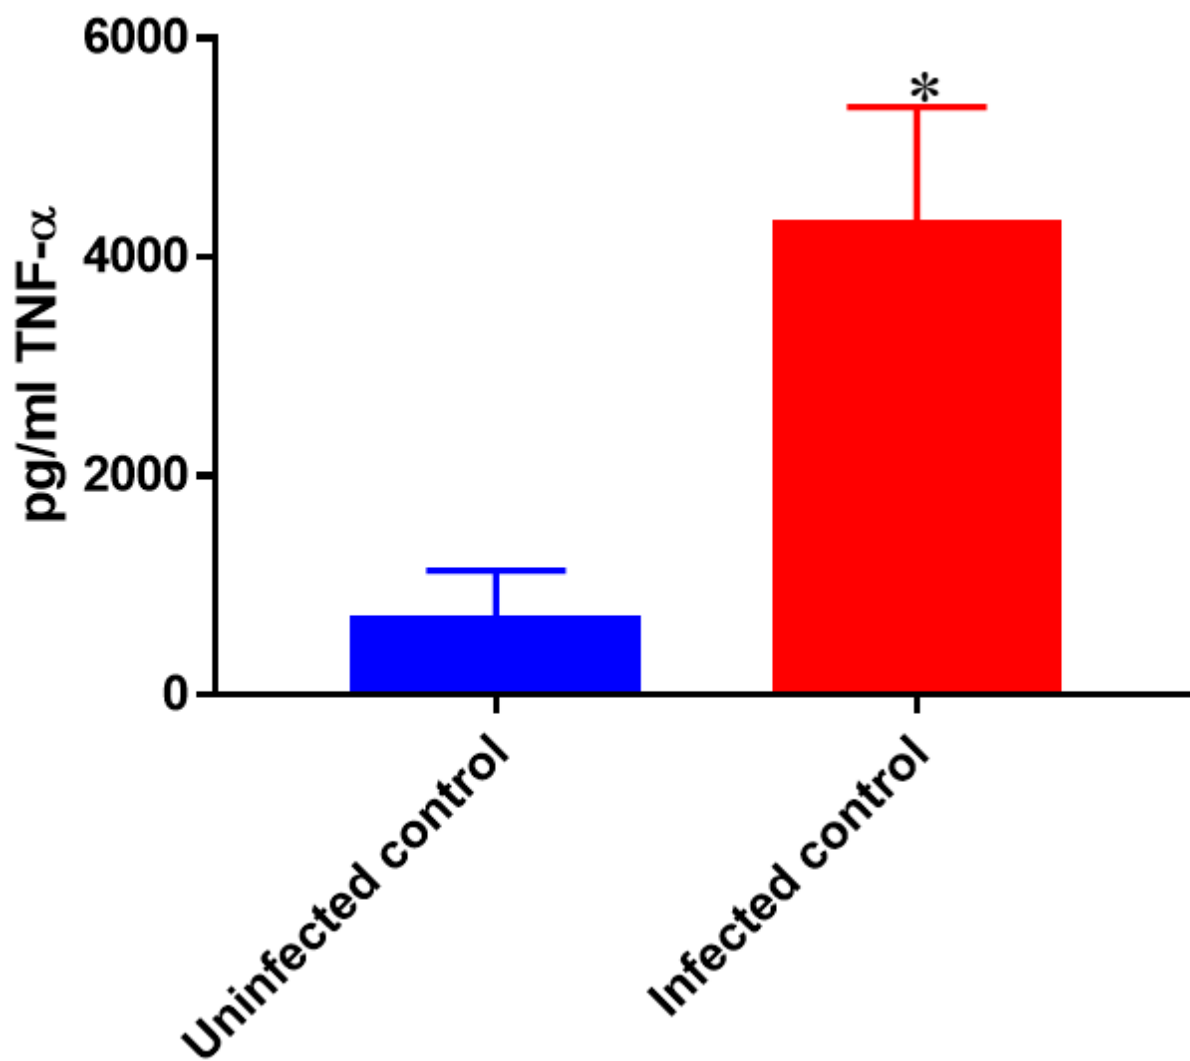

908

909 Fig. 1C: Levels of TNF- $\alpha$  in the supernatants of uninfected and *M. tb*-infected THP-1 cells.

910

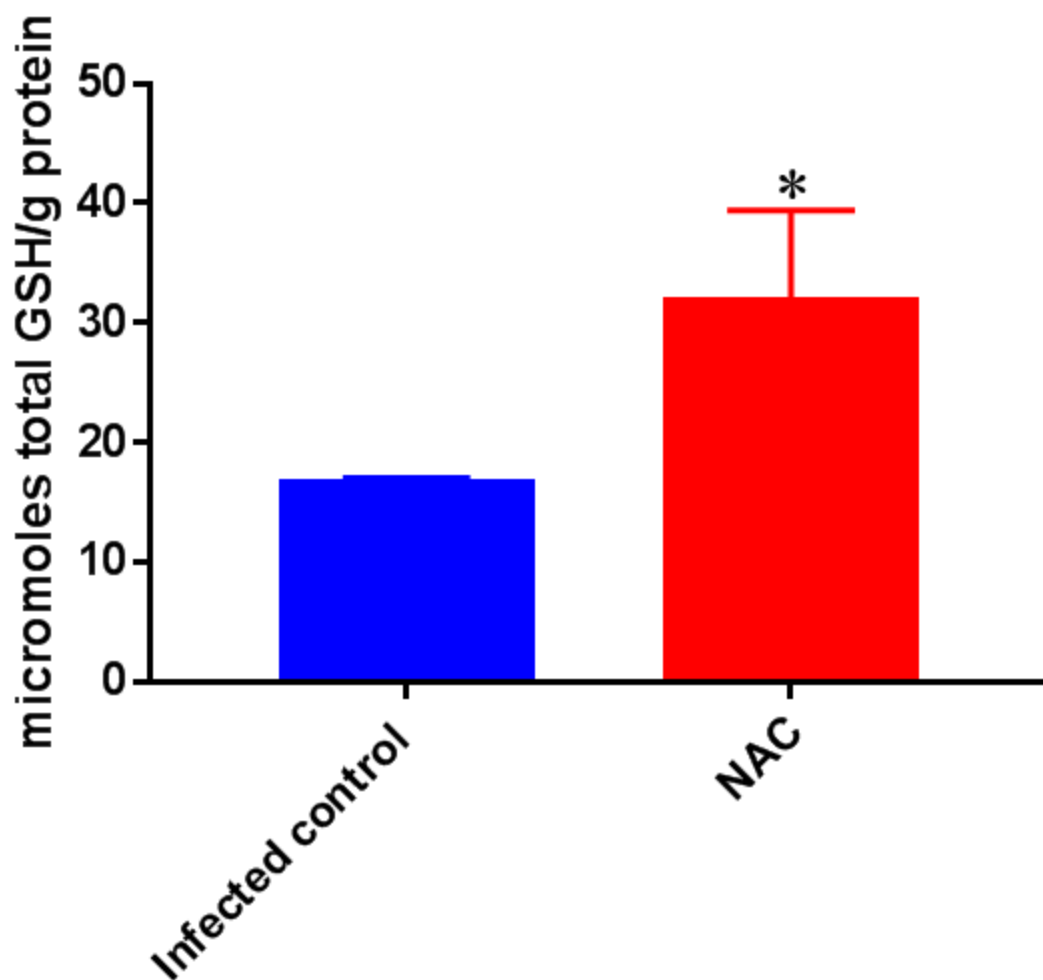

911

912 **Fig. 2A: Levels of total GSH in *M. tb*-infected and *M. tb*-infected + NAC-treated THP-1**

913 **cells.**

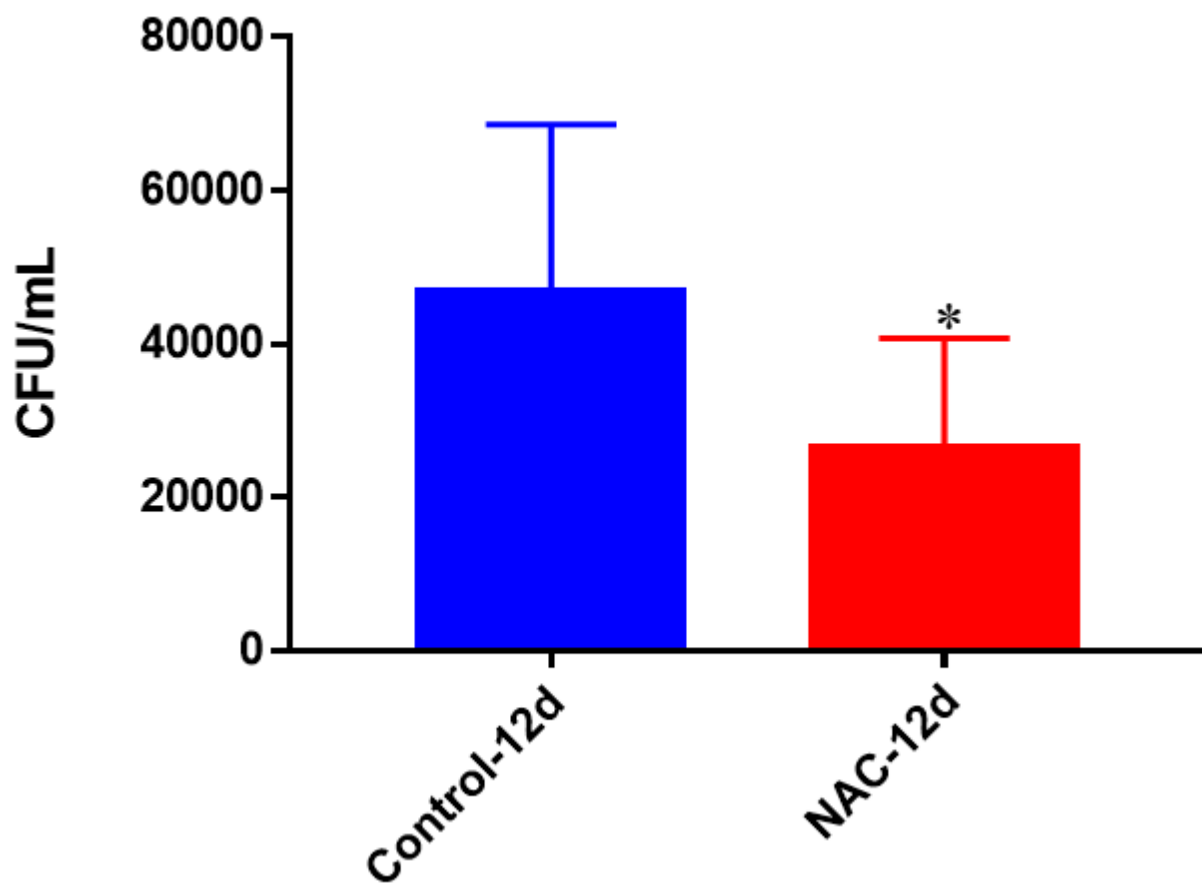

914

915 **Fig. 2B: Survival of Erdman strain of *M. tb* inside untreated and NAC-treated THP-1**

916 **macrophages.**

917

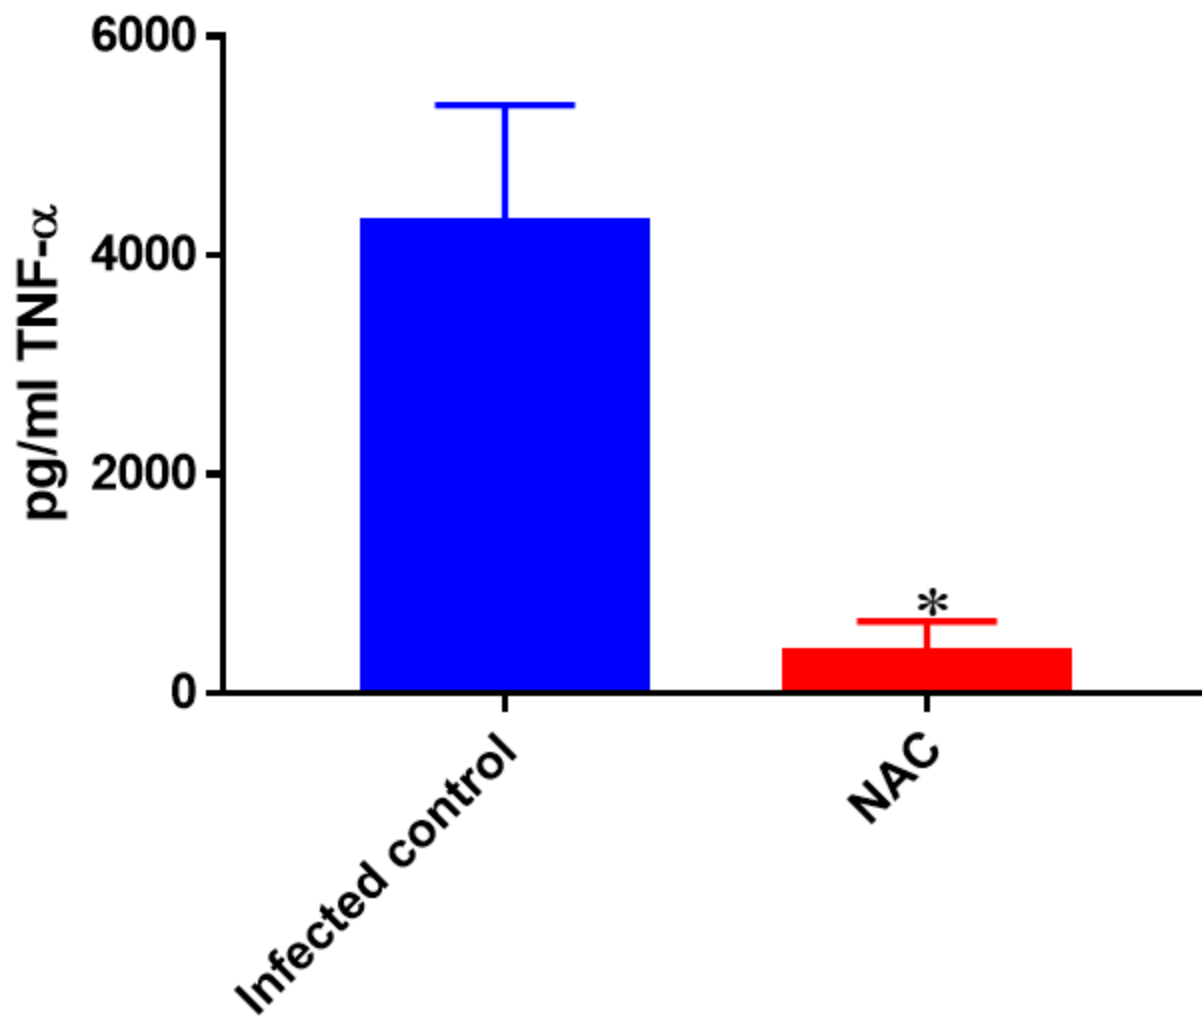

918

919 **Fig. 2C: Assay of TNF- $\alpha$  in the supernatants from *M. tb*-infected and *M. tb*-infected + NAC-**  
920 **treated THP-1 cells.**

921

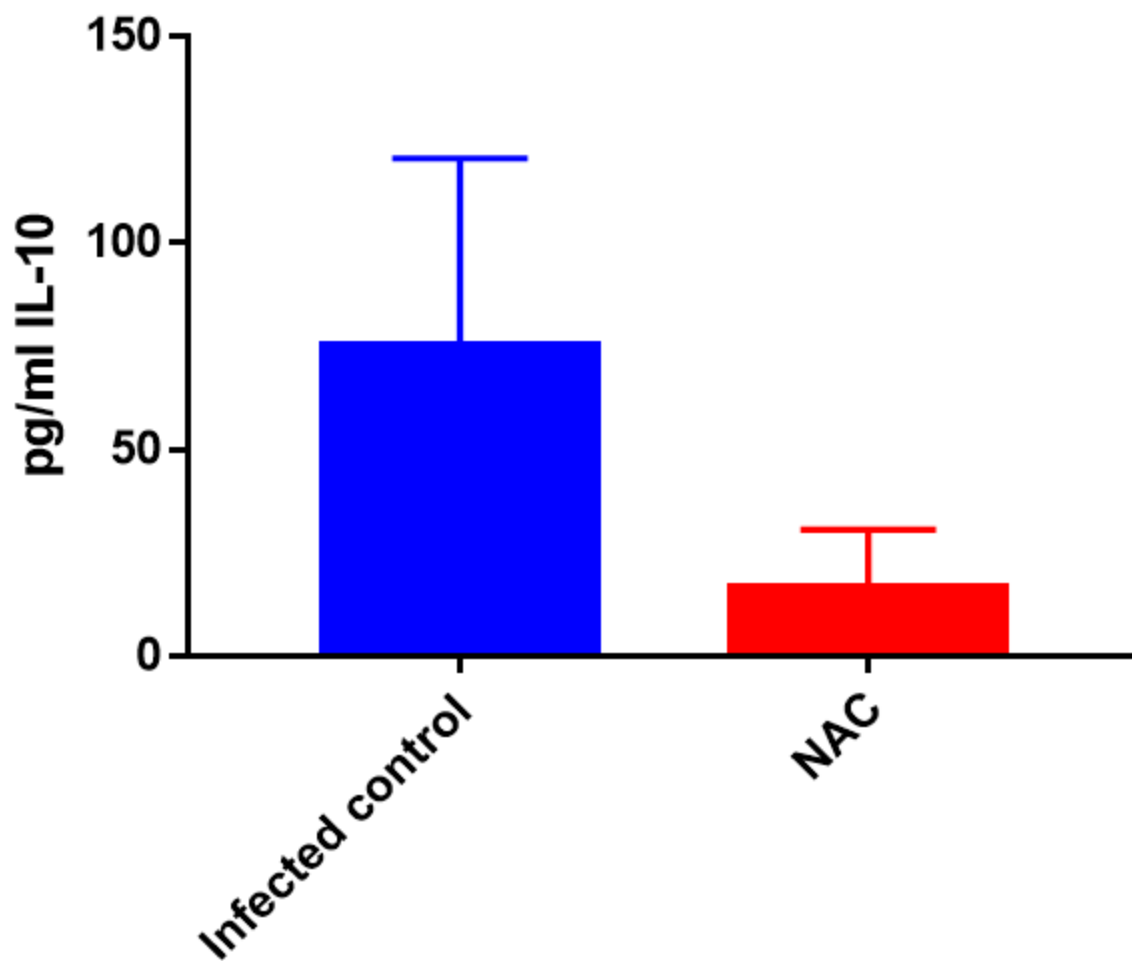

922

923 **Fig. 2D: Assay of IL-10 in the supernatants from *M. tb*-infected and *M. tb*-infected + NAC-**  
924 **treated THP-1 cells.**

925

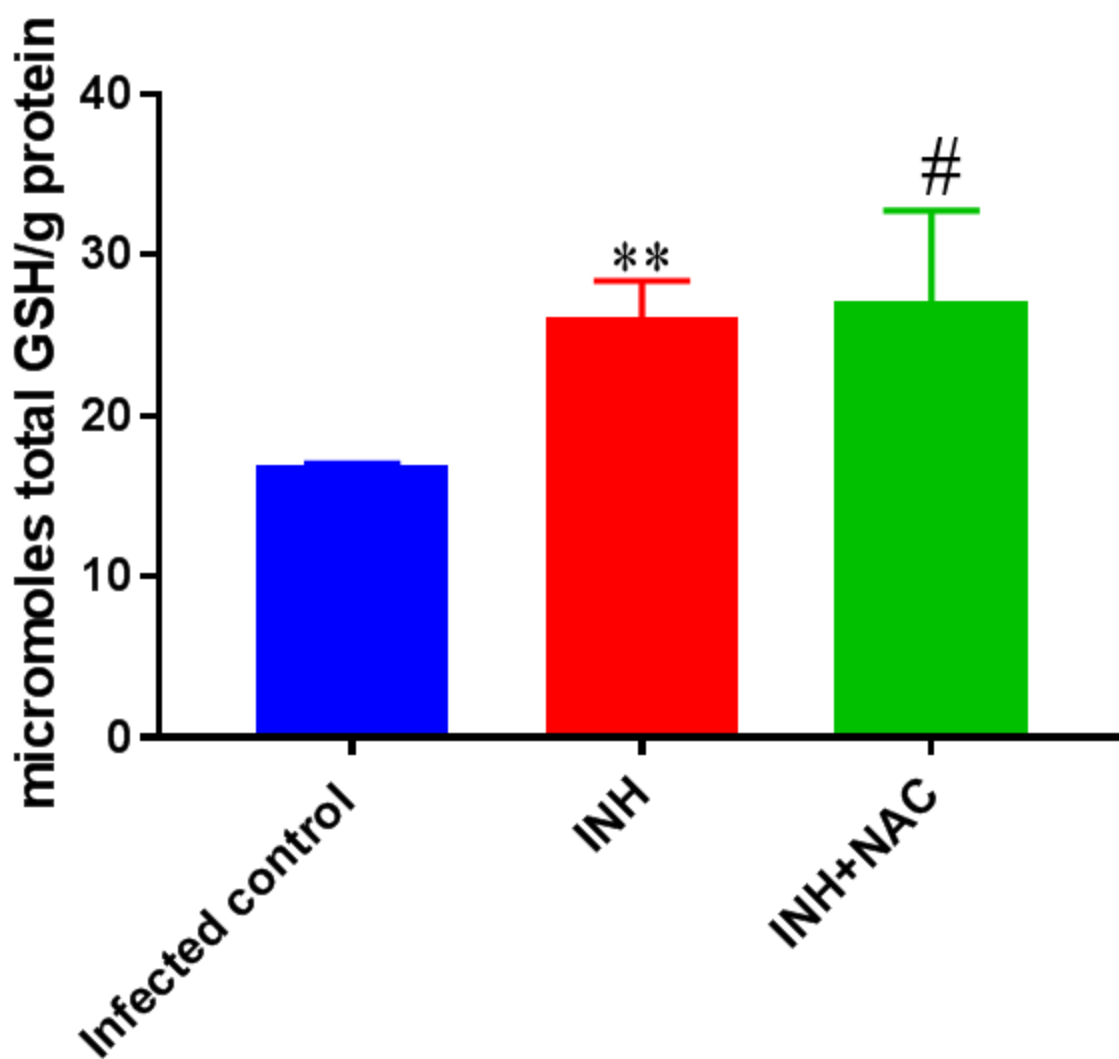

926

927 Fig. 3A: Levels of total GSH in *M. tb*-infected, *M. tb*-infected + INH-treated and *M. tb*-

928 infected + INH + NAC-treated THP-1 cells.



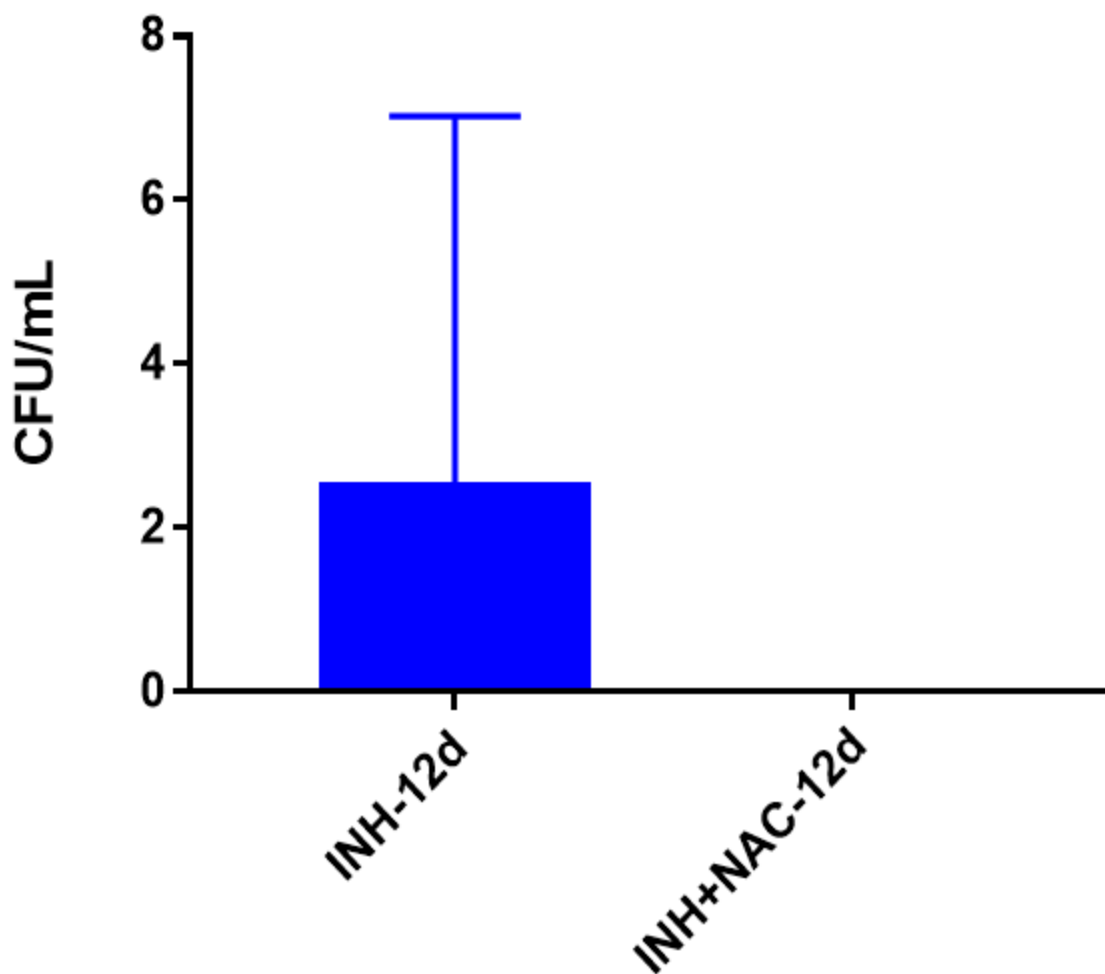

929

930 **Fig. 3B: Survival of Erdman strain of *M. tb* inside INH and INH + NAC-treated THP-1**  
931 **macrophages.**

932

933

934

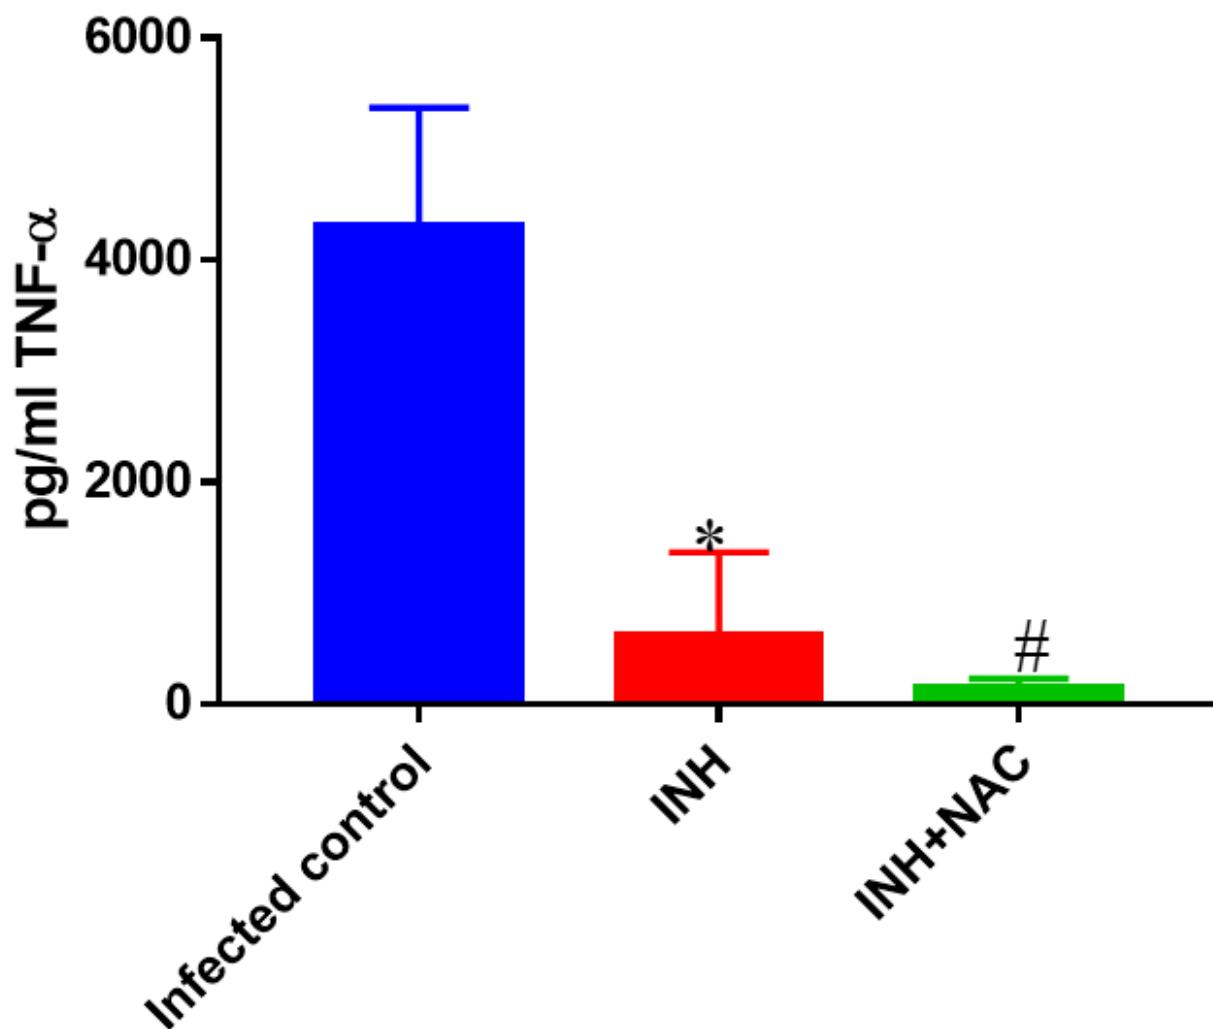

935

936 **Fig. 3C: Assay of TNF- $\alpha$  in the supernatants from INH and INH + NAC-treated THP-1**

937 cells.

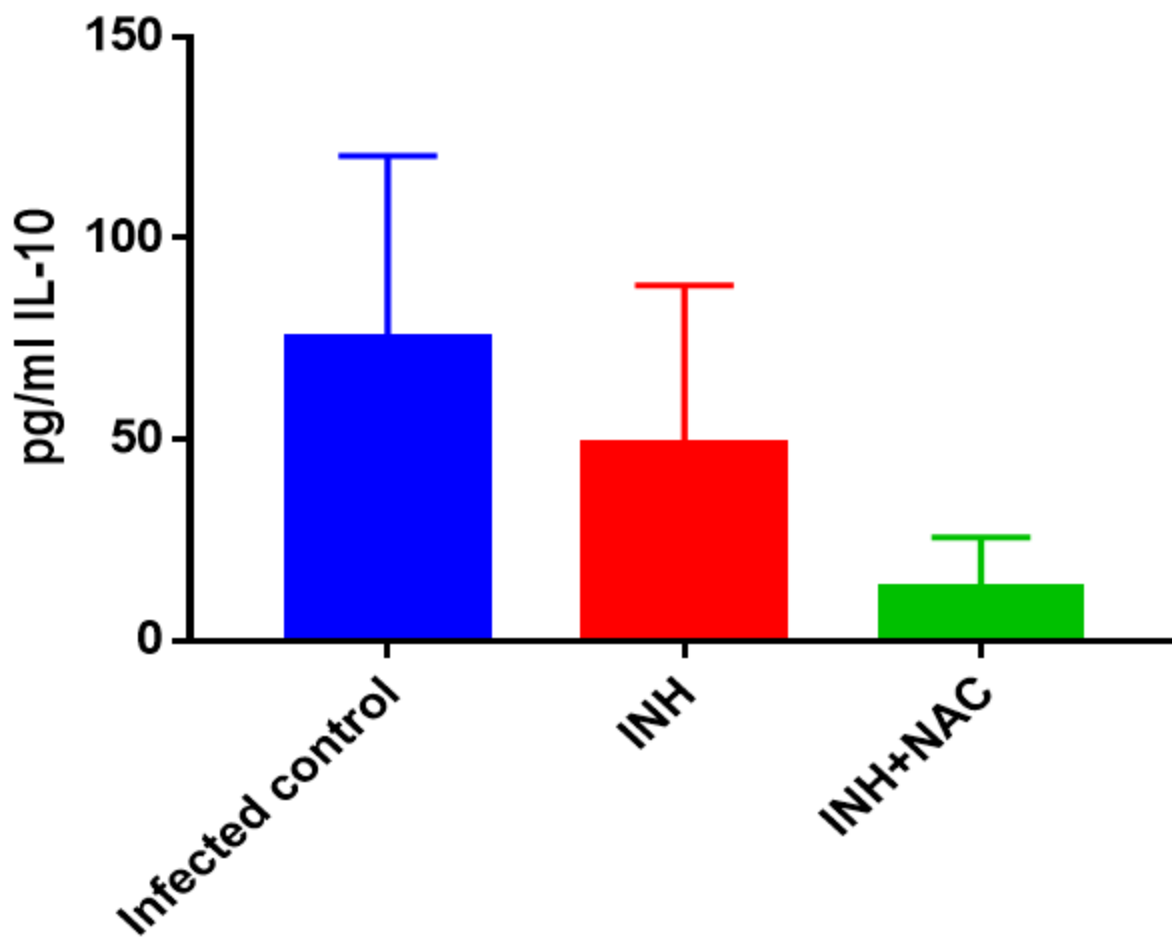

938

939 **Fig. 3D: Assay of IL-10 in the supernatants from INH and INH + NAC-treated THP-1 cells.**

940

941

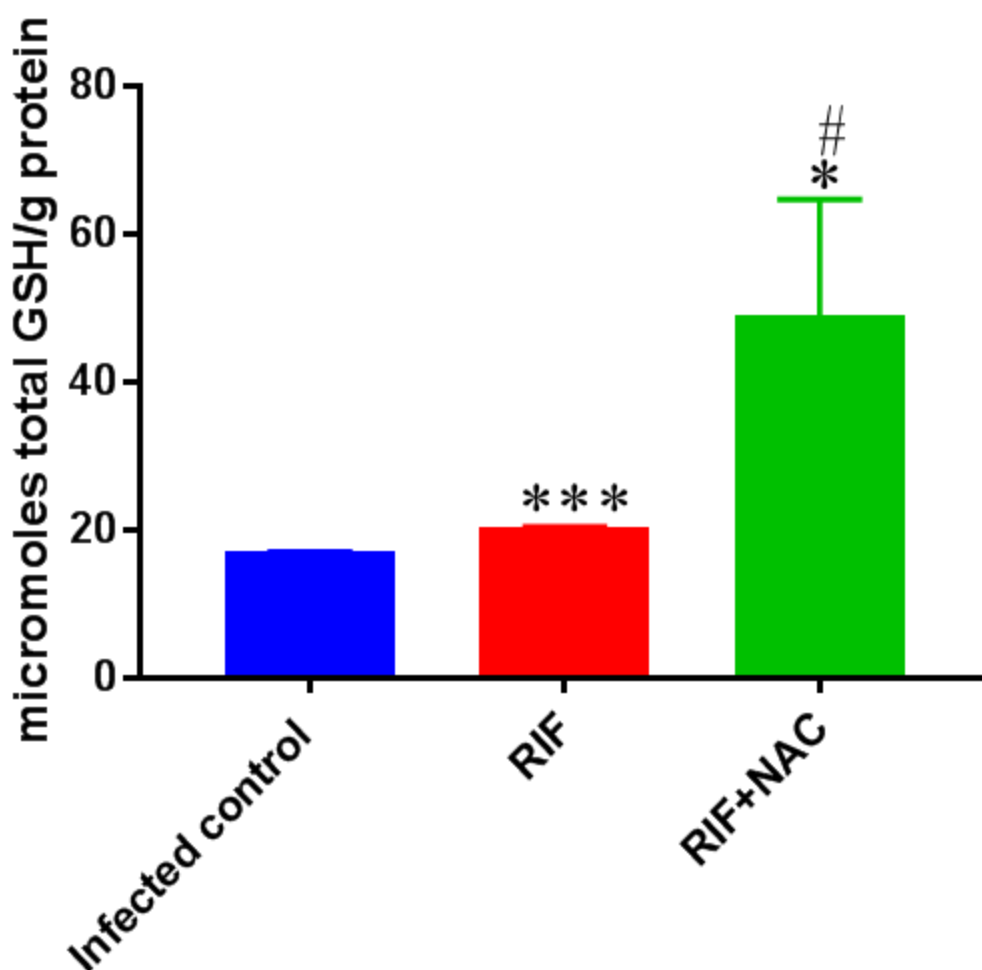

942

943 **Fig. 4A: Levels of total GSH in *M. tb*-infected, *M. tb*-infected + RIF-treated and *M. tb*-**

944 **infected + RIF + NAC-treated THP-1 cells.**

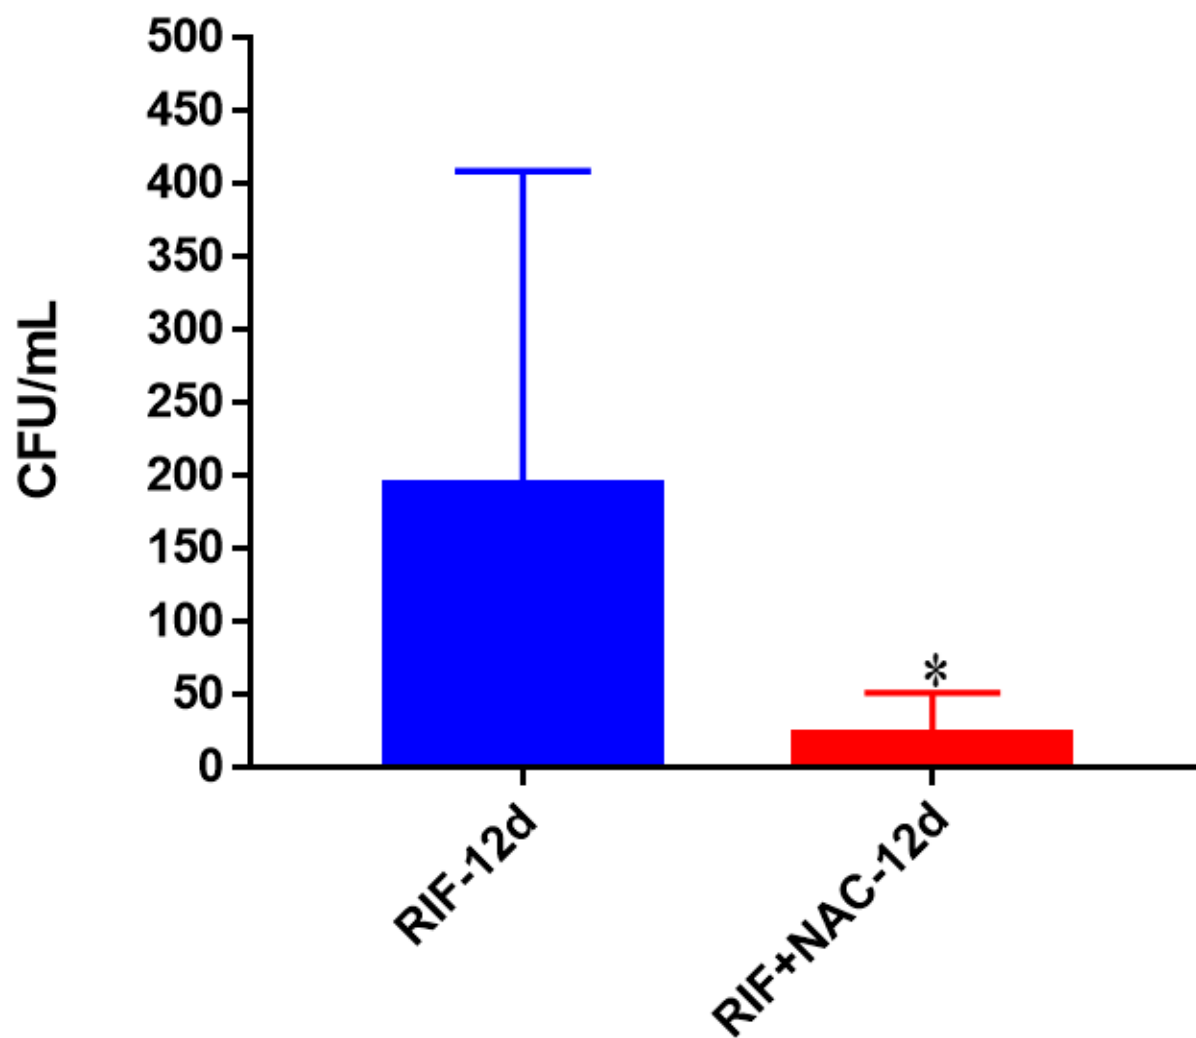

945

946 **Fig. 4B: Survival of Erdman strain of *M. tb* inside RIF and RIF + NAC-treated THP-1**

947 **macrophages.**

948

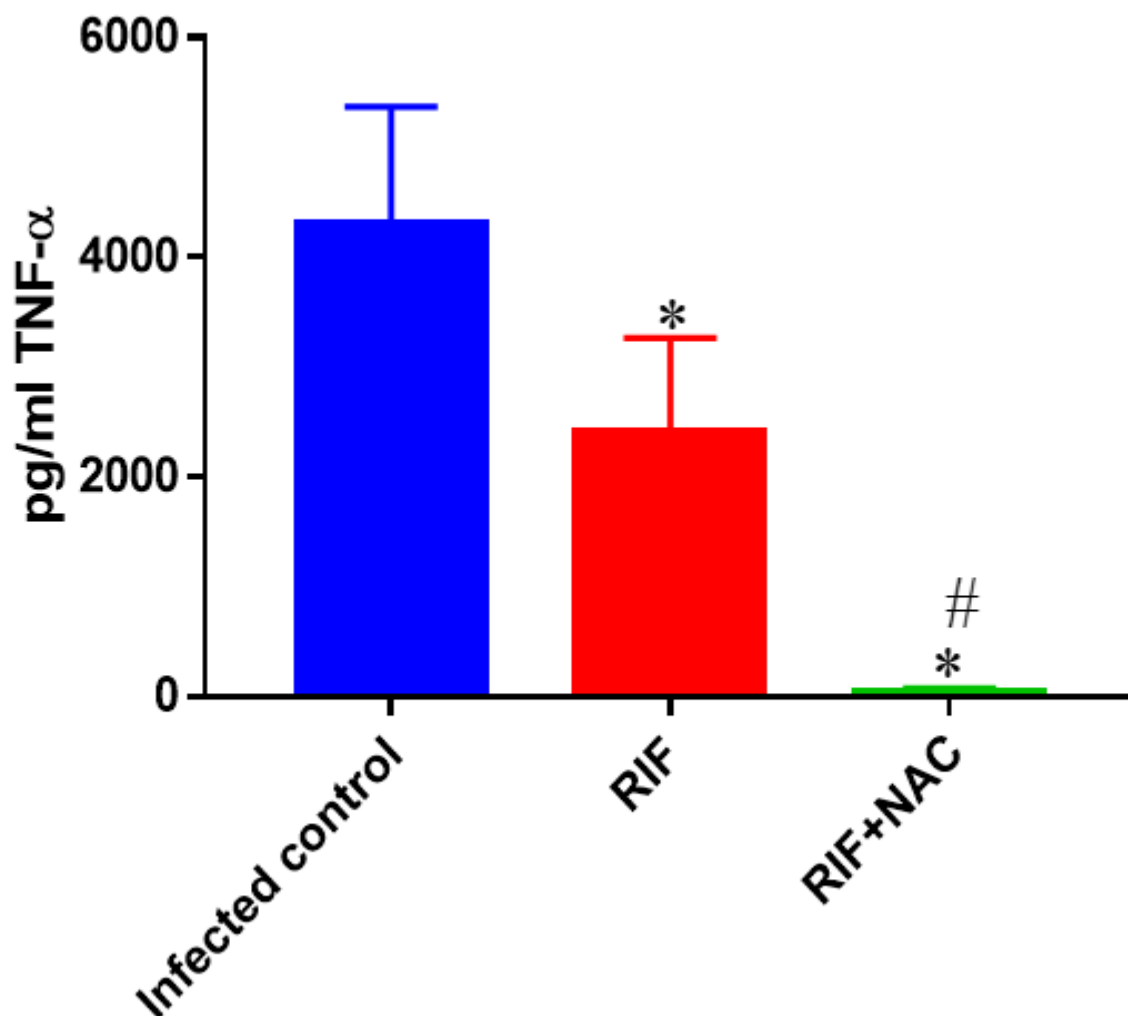

949

950 **Fig. 4C: Assay of TNF- $\alpha$  in the supernatants from RIF and RIF + NAC-treated THP-1**

951 **cells.**

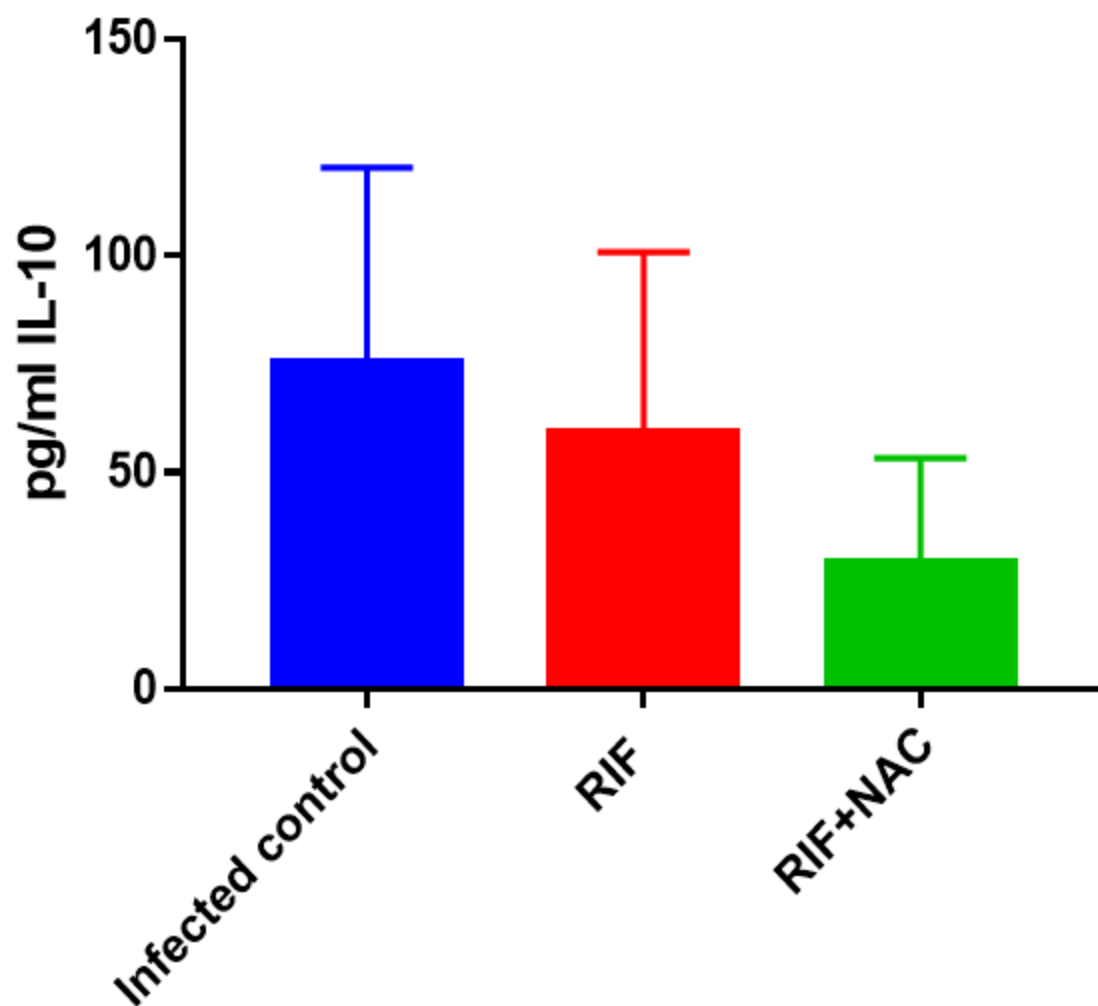

952

953 **Fig. 4D: Assay of IL-10 in the supernatants from RIF and RIF + NAC-treated THP-1 cells.**

954

955

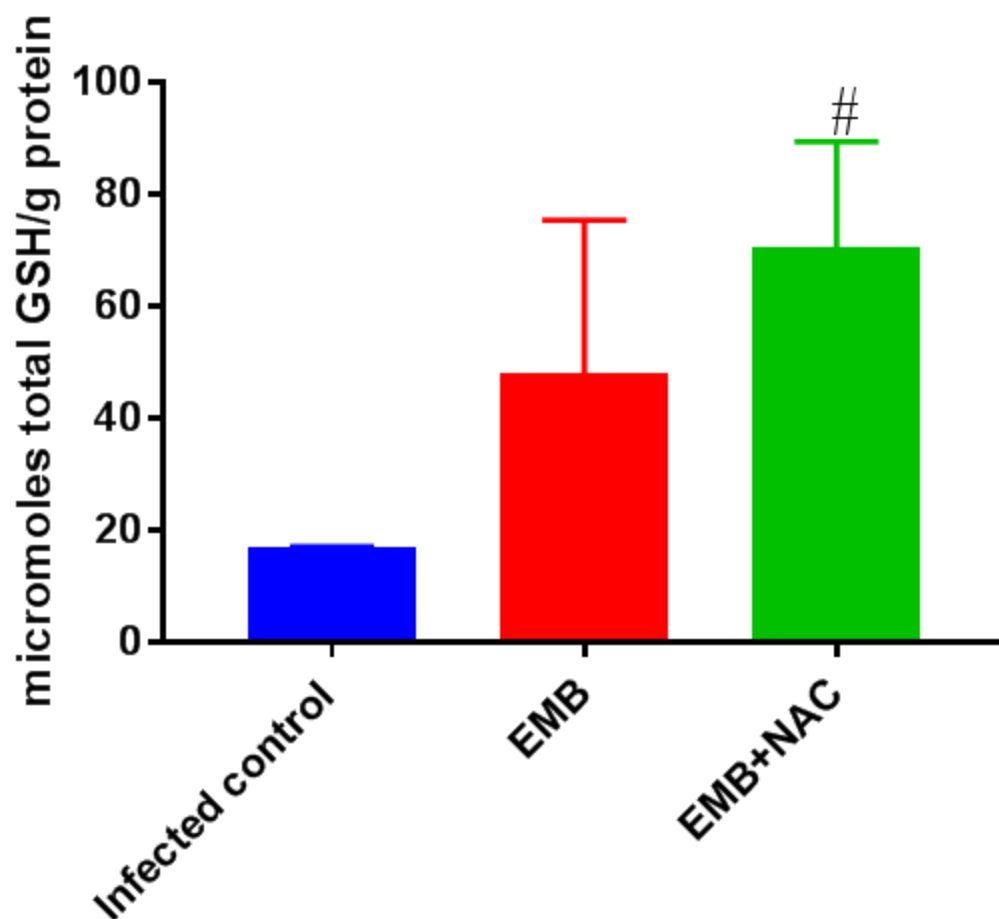

956

957 **Fig. 5A: Levels of total GSH in *M. tb*-infected, *M. tb*-infected + EMB-treated and *M. tb*-**  
958 **infected + EMB + NAC-treated THP-1 cells.**



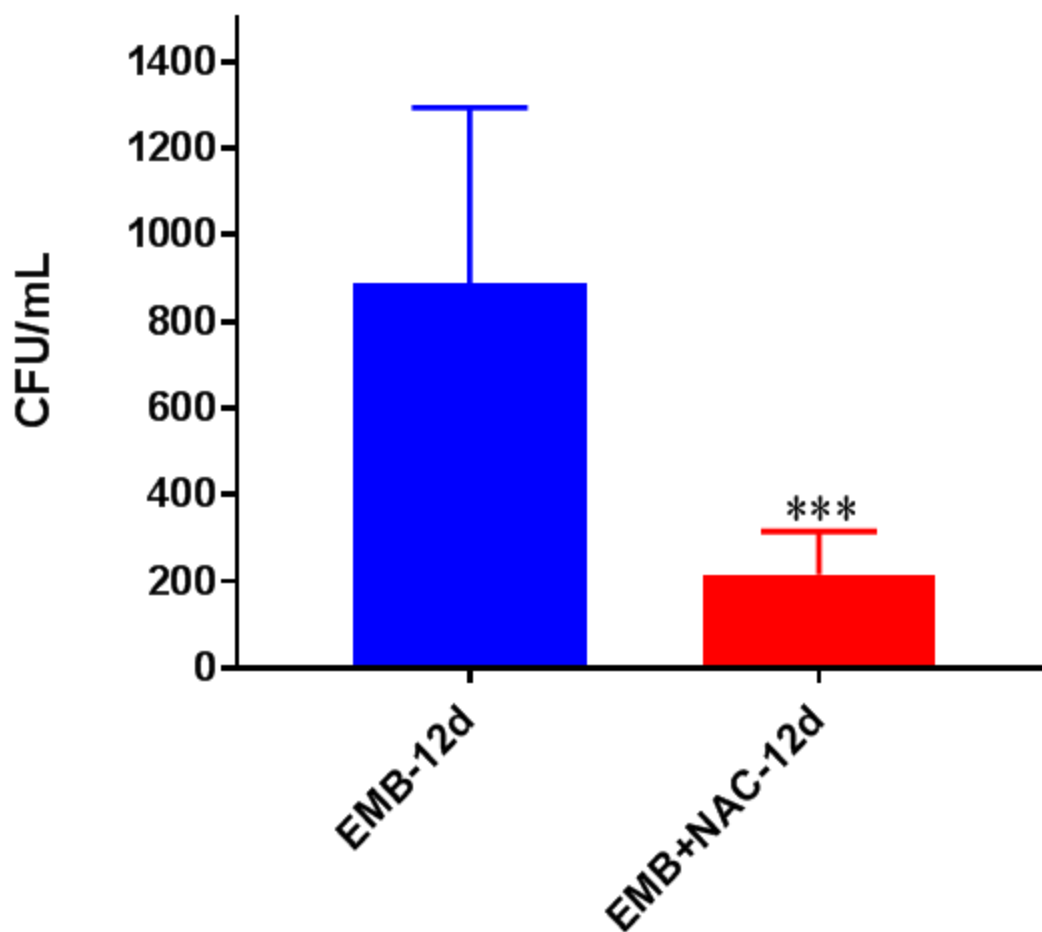

959

960 **Fig. 5B: Survival of Erdman strain of *M. tb* inside EMB and EMB + NAC-treated THP-1**  
961 **macrophages.**

962

963

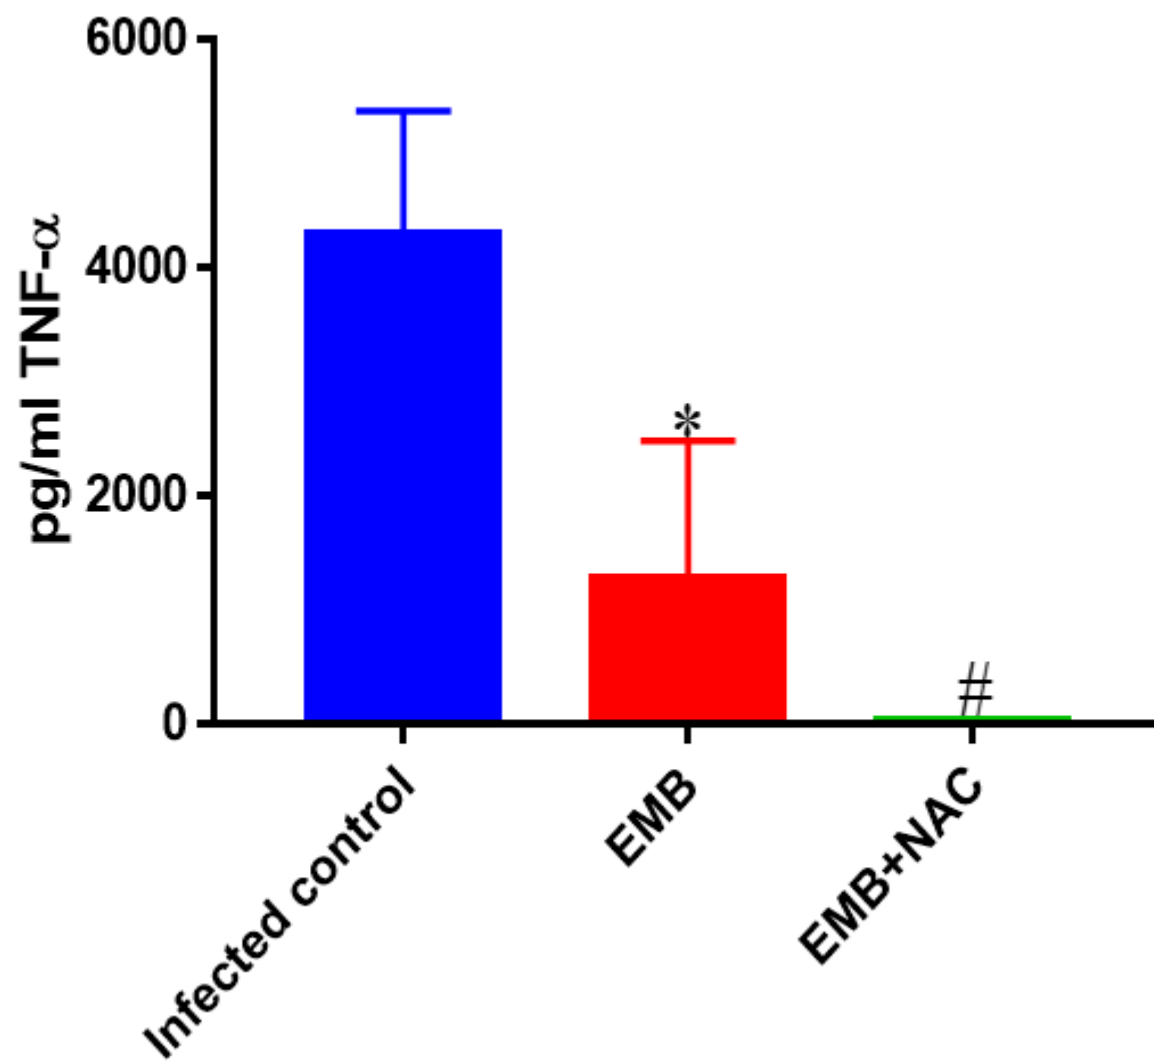

964

965 **Fig. 5C: Assay of TNF- $\alpha$  in the supernatants from EMB and EMB + NAC-treated THP-1**

966 **cells.**

967

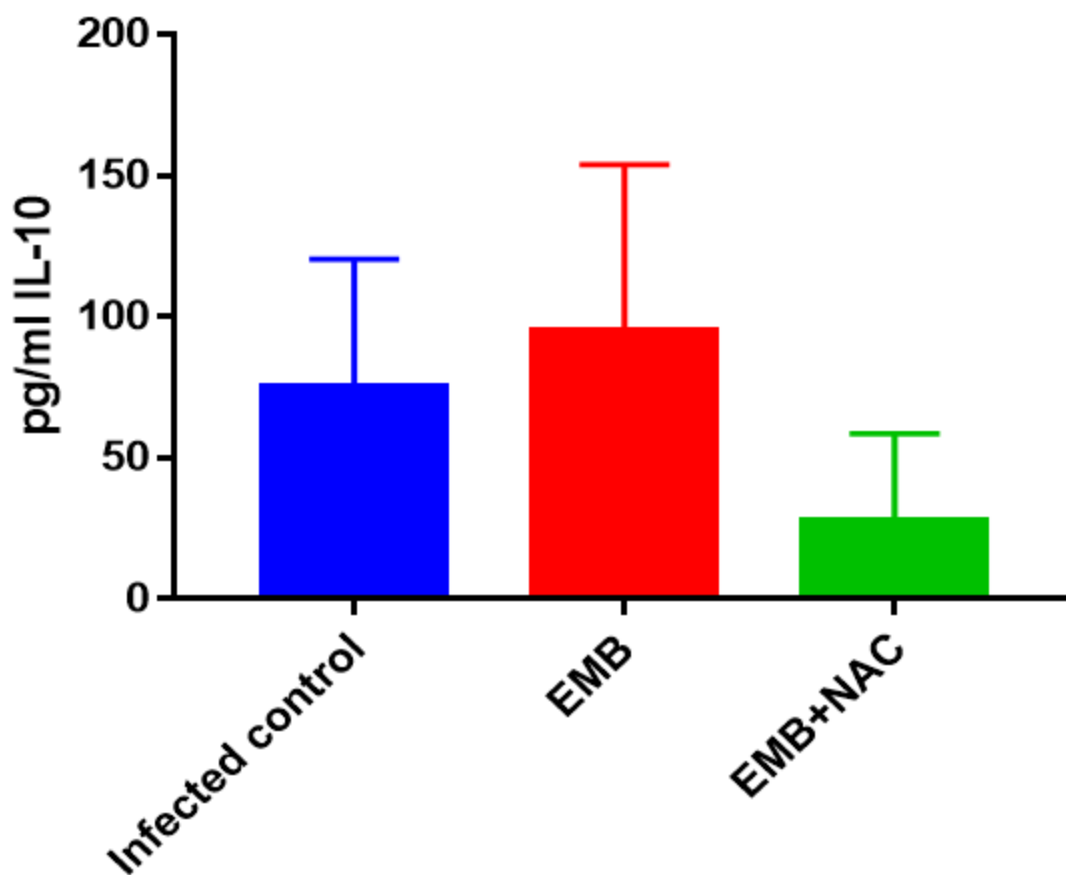

968

969 **Fig. 5D: Assay of IL-10 in the supernatants from EMB and EMB + NAC-treated THP-1**

970 **cells.**

971

972

973

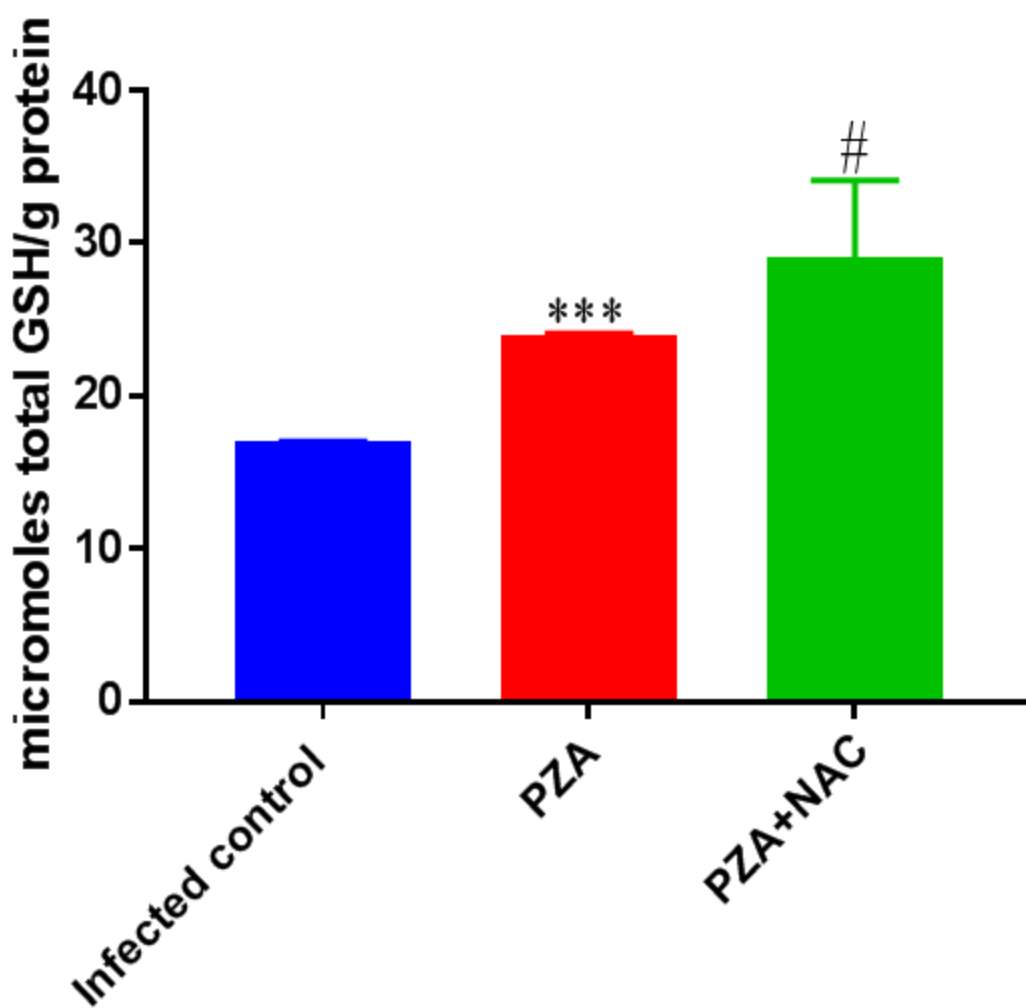

974

975 **Fig. 6A: Levels of total GSH in *M. tb*-infected, *M. tb*-infected + PZA-treated and *M. tb*-**

976 **infected + PZA + NAC-treated THP-1 cells.**

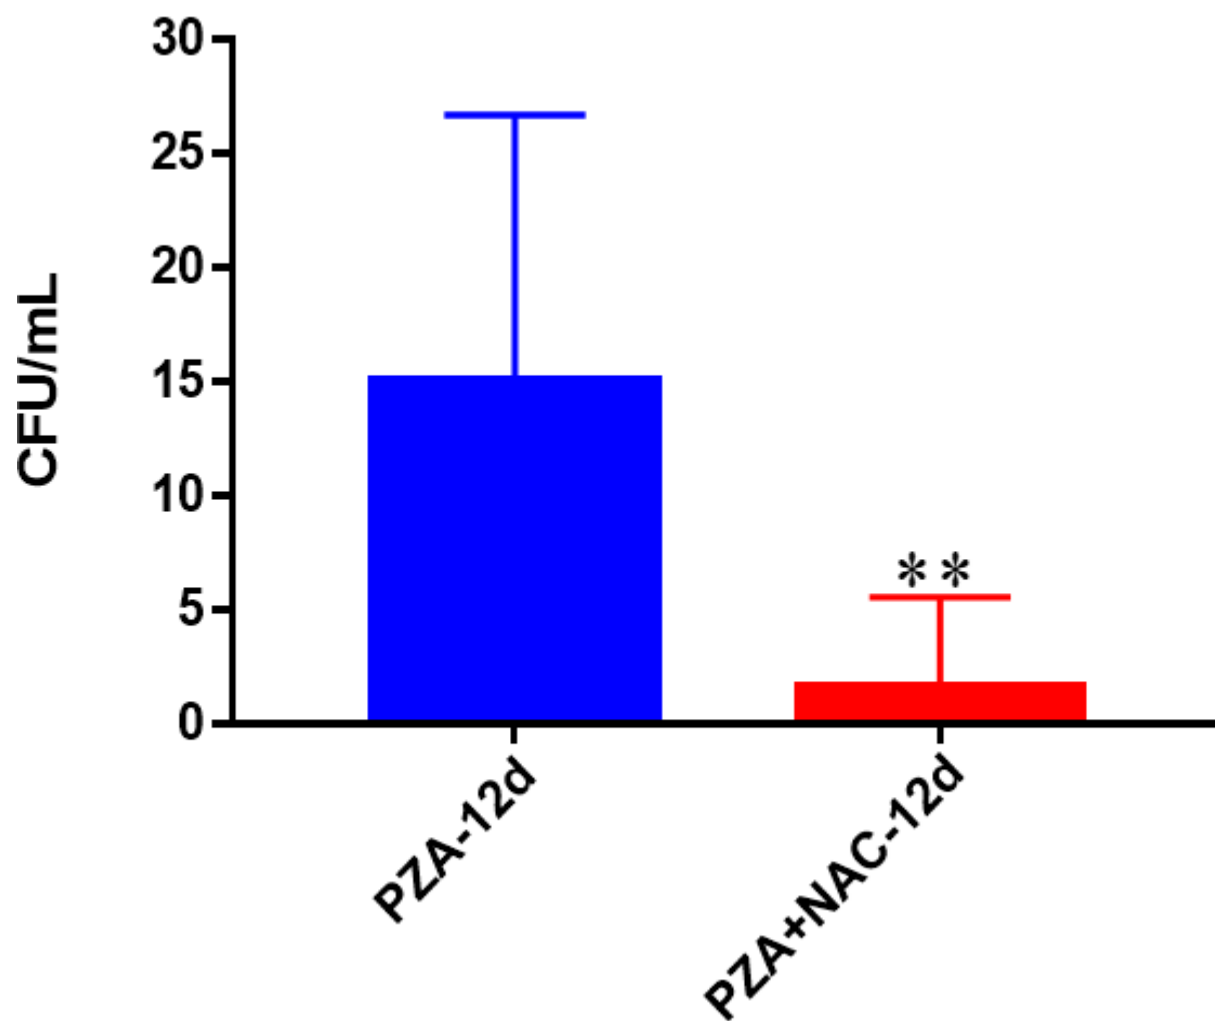

977

978 **Fig. 6B: Survival of Erdman strain of *M. tb* inside PZA and PZA + NAC-treated THP-1**

979 **macrophages.**

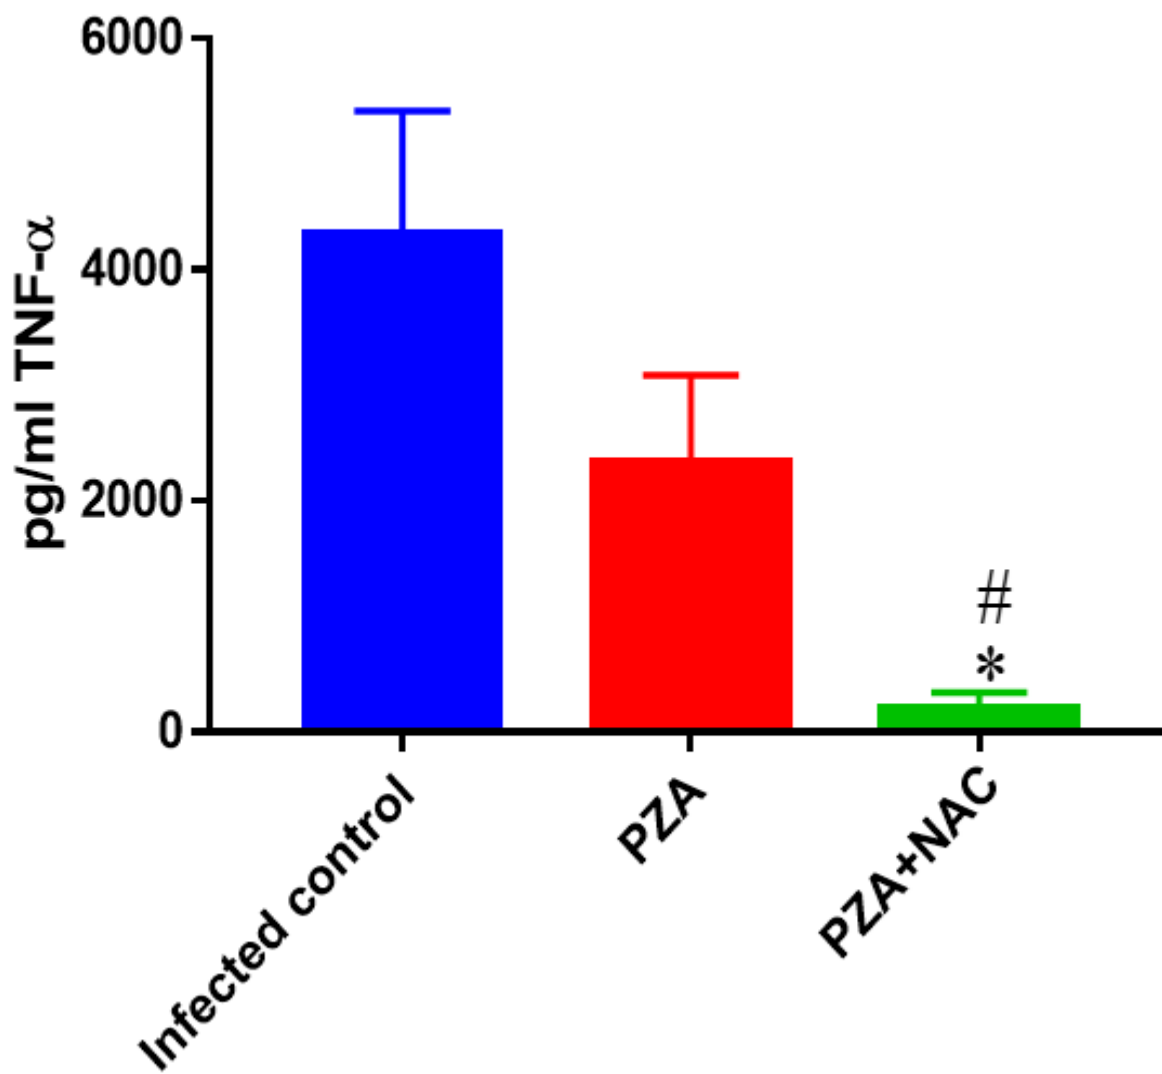

980

981 **Fig. 6C: Assay of TNF- $\alpha$  in the supernatants from PZA and PZA + NAC-treated THP-1**

982 **cells.**

983

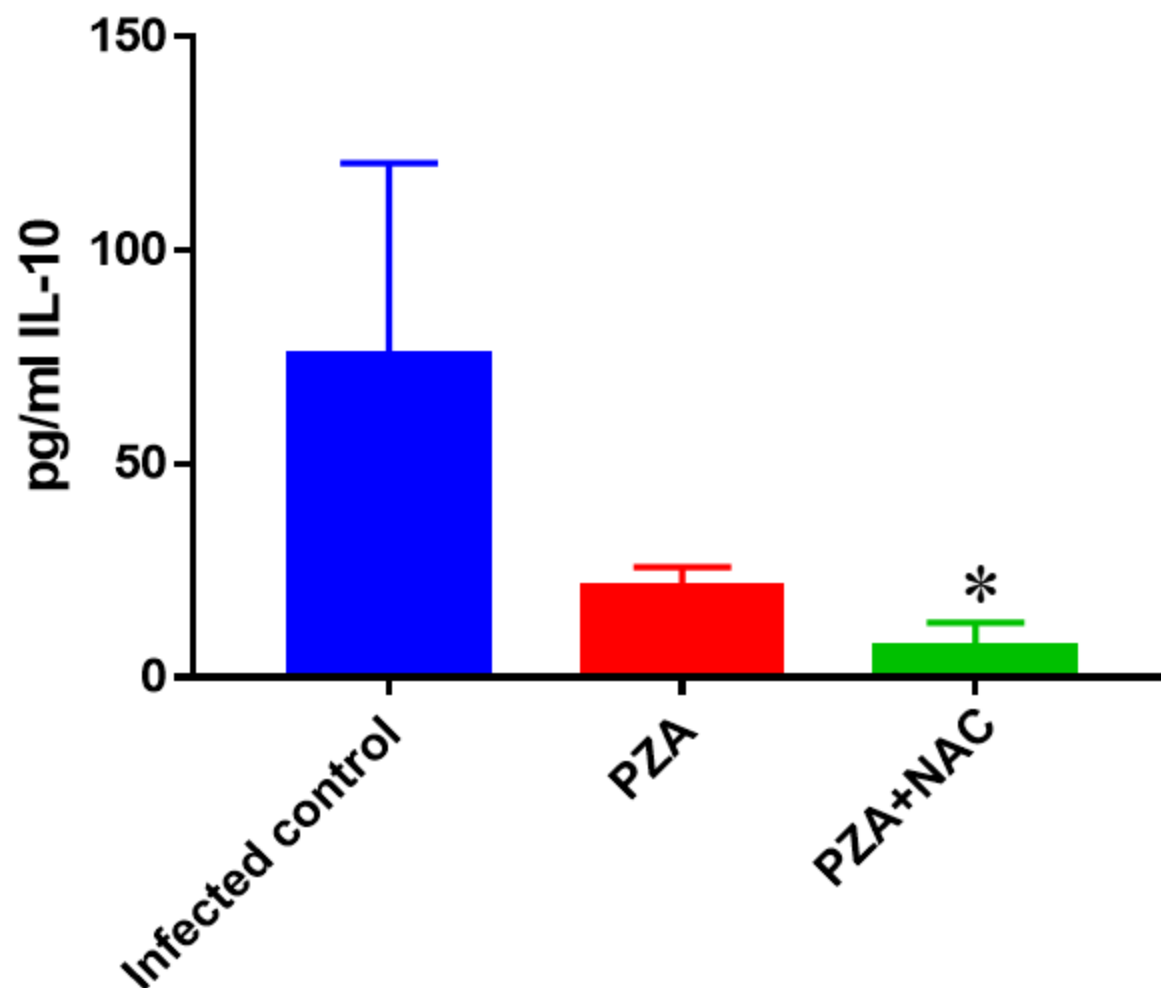

984

985 **Fig. 6D: Assay of IL-10 in the supernatants from PZA and PZA + NAC-treated THP-1**

986 **cells.**

987

988
